1 **Mutations in *Kinesin Family Member 6* Reveal Specific Role in Ependymal**  
2 **Cell Function and Human Neuro-Cranial Development**

3

4 Mia J. Konjikusic<sup>1,2</sup>, Patra Yeetong<sup>3,4,5</sup>, Rungnapa Ittiwut<sup>3,4</sup>, Kanya Suphapeetiporn<sup>3,4</sup>, John B.  
5 Wallingford<sup>2</sup>, Christina A. Gurnett<sup>6</sup>, Vorasuk Shotelersuk<sup>3,4,\*</sup>, and Ryan S. Gray<sup>1,\*</sup>

6

7 <sup>1</sup> Department of Pediatrics, Dell Pediatric Research Institute, 1400 Barbara Jordan Blvd, The  
8 University of Texas at Austin, Dell Medical School, Austin, Texas 78723, USA.

9 <sup>2</sup> Department of Molecular Biosciences, Patterson Labs, 2401 Speedway, The University of  
10 Texas at Austin, Austin, Texas 78712, USA.

11 <sup>3</sup> Center of Excellence for Medical Genetics, Department of Pediatrics, Faculty of Medicine,  
12 Chulalongkorn University, Bangkok 10330, Thailand.

13 <sup>4</sup> Excellence Center for Medical Genetics, King Chulalongkorn Memorial Hospital, the Thai Red  
14 Cross Society, Bangkok 10330, Thailand.

15 <sup>5</sup> Division of Human Genetics, Department of Botany, Faculty of Science, Chulalongkorn  
16 University, Bangkok 10330, Thailand

17 <sup>6</sup> Department of Neurology, Division Pediatric Neurology, Washington University School of  
18 Medicine, 660 S Euclid Ave, St Louis, MO 63110, USA.

19 \*corresponding authors: Ryan S. Gray: [ryan.gray@austin.utexas.edu](mailto:ryan.gray@austin.utexas.edu) or Vorasuk Shotelersuk:  
20 [vorasuk.s@chula.ac.th](mailto:vorasuk.s@chula.ac.th)

21 **Keywords:** Kinesin, Ependymal cell cilia, intellectual disability

22 **Short running title: KIF6 Specifically Regulates Ependymal Cell Function**

23

## 24 **ABSTRACT**

25 Cerebrospinal fluid flow is crucial for neurodevelopment and homeostasis of the ventricular  
26 system of the brain, with localized flow being established by the polarized beating of the  
27 ependymal cell (EC) cilia. Here, we report a homozygous one base-pair deletion, c.1193delT  
28 (p.Leu398Glnfs\*2), in the *Kinesin Family Member 6 (KIF6)* gene in a child displaying neuro-  
29 cranial defects and intellectual disability. To test the pathogenicity of this novel human *KIF6*  
30 mutation we engineered an analogous C-terminal truncating mutation in mouse. These mutant  
31 mice display severe, postnatal-onset hydrocephalus. We generated a *Kif6-LacZ* transgenic mouse  
32 strain and report expression specifically and uniquely within the ependymal cell (EC) layer of the  
33 brain, without labeling other multiciliated mouse tissues. Analysis of *Kif6* mutant mice with  
34 scanning electron microscopy (SEM) and immunofluorescence (IF) revealed a reduction in EC  
35 cilia, without effect on other multiciliated tissues. Consistent with our findings in mice, defects  
36 of the ventricular system and EC cilia were observed in *kif6* mutant zebrafish. Overall, this work  
37 describes the first clinically-defined *KIF6* homozygous null mutation in human and defines KIF6  
38 as a conserved mediator of neuro-cranial morphogenesis with a specific role in the maintenance  
39 of EC cilia in vertebrates.

40

## 41 AUTHOR SUMMARY

42 Cerebrospinal fluid flow is crucial for neurodevelopment and homeostasis of the ventricular  
43 system of the brain. Localized flows of cerebrospinal fluid throughout the ventricular system of  
44 the brain are established from the polarized beating of the ependymal cell (EC) cilia. Here, we  
45 identified a homozygous truncating mutation in *KIF6* in a child displaying neuro-cranial defects  
46 and intellectual disability. To test the function of *KIF6* *in vivo*, we engineered mutations of *Kif6*  
47 in mouse. These *Kif6* mutant mice display severe hydrocephalus, coupled with a loss of EC cilia.  
48 Similarly, we observed hydrocephalus and a reduction in EC cilia in *kif6* mutant zebrafish.  
49 Overall, this work describes the first clinically-defined *KIF6* mutation in human, while our  
50 animal studies demonstrate the pathogenicity of mutations in *KIF6* and establish *KIF6* as a  
51 conserved mediator of neuro-cranial development and EC cilia maintenance in vertebrates.

52

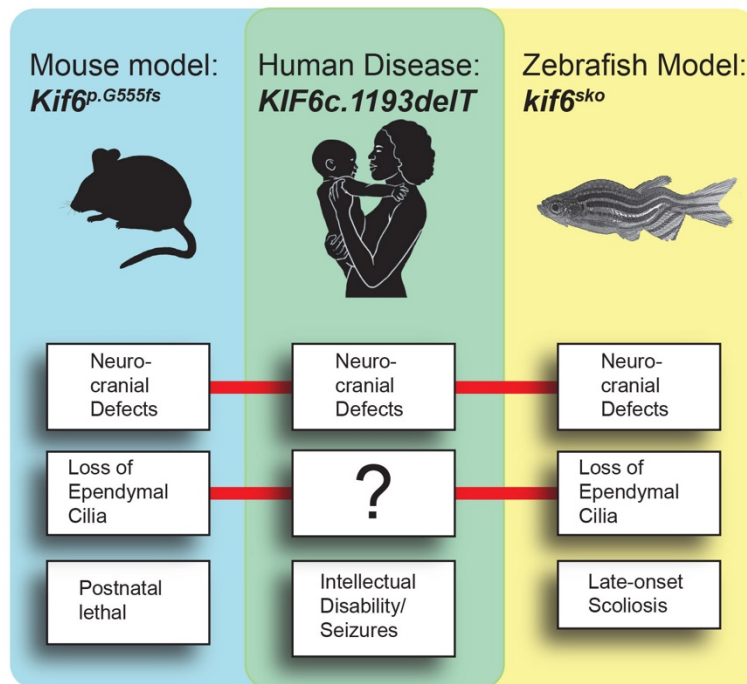

53

54

## 55 INTRODUCTION

56 The delicate balance of cerebrospinal fluid (CSF) production and flow is important for the  
57 morphogenesis and function of the brain development and homeostasis. CSF circulation in  
58 human is largely due to gradients established by the secretion of CSF from the choroid plexuses,  
59 and its resorption at the arachnoid granulations [1]. The clinical significance of CSF stasis  
60 includes hydrocephalus and intracranial hypertension. Moreover, severely diminished CSF flow  
61 combined with increased intracranial pressure can secondarily cause ventriculomegaly, cognitive  
62 impairment, as well as degenerative and age-related dementias [2]. For these reasons, the  
63 identification of genetic risk factors involved in the pathogenesis of CSF stasis is critical for the  
64 development of genetic diagnostics and early interventions for these disorders.

65 One element for circulation of CSF is the multiciliated ependymal cells (ECs), which are  
66 specialized glial cells covering the ventricular walls of the brain and spinal canal [3]. In contrast,  
67 to primary cilia which are single, immotile cellular organelles extending from most cell types,  
68 ECs contain dozens of apically-arranged motile cilia, which beat in a polarized fashion to  
69 generate localized or near-wall CSF flows [4]. Defective EC cilia or loss of their polarized  
70 beating causes a disruption of this localized CSF flow leading to increased intracranial pressure,  
71 and dilation of ventricles and hydrocephalus in mice [5-8]. Importantly, this EC cilia-driven CSF  
72 flow is crucial for regulating brain function and adult neurogenesis [4, 9].

73 Impaired ciliary motility due to disruptions of the key kinesins, dyneins, and intraflagellar  
74 components necessary in most or all cilia, results in a syndromic condition known as primary  
75 ciliary dyskinesia (PCD) in humans [10, 11]. While hydrocephalus can occur in some PCD  
76 patients, it is a less common manifestation of the disease in humans [11]. In contrast, genes  
77 implicated in PCD or mutations which disrupt the structure or motility of all motile cilia are



78 strongly correlated with hydrocephalus in mouse [8]. Alternatively, some hydrocephalus in mice  
79 with dysfunctional cilia may be the result of altered function of the choroid plexus, prior to the  
80 onset of cilia-driven CSF flow [7].

81 *KIF6* (Kinesin family member 6, MIM: 613919) encodes a member of the kinesin-9  
82 superfamily of microtubules motor proteins which act predominately as "plus-end" directed  
83 molecular motors that generate force and movement across microtubules [12]. Kinesins are  
84 critical for numerous cellular functions such as intracellular transport and cell division, as well as  
85 for building and maintaining the cilium in a process known as intraflagellar transport [13].  
86 During this process, kinesins have been shown to transport cargo within the ciliary axoneme  
87 [14], establish motility and compartmentalization of the axoneme [15], or to facilitate plus-end  
88 directed microtubule disassembly and control of axonemal length [16]. As such, multiple  
89 kinesins have shown to be associated with monogenic disorders affecting a wide-spectrum of  
90 tissues, with several modes of inheritance ([www.omim.org](http://www.omim.org)). Interestingly, *KIF6* has previously  
91 been proposed as locus for susceptibility to coronary heart disease [17], while other studies did  
92 not substantiate this association [18]. We previously reported that *kif6* mutant zebrafish are adult  
93 viable exhibiting larval-onset scoliosis without obvious heart defects [19]. Because of these  
94 conflicting results, and a lack of relevant mouse models, the role of *KIF6* in human disease  
95 remains an open question.

96 Here, we present a patient with consanguineous parents, presenting with neuro-cranial  
97 defects and intellectual disability. Homozygosity mapping followed by whole-exome sequencing  
98 (WES) identified a novel homozygous frameshift mutation in *KIF6* which is predicted to result  
99 in the truncation of the C-terminal cargo-binding domain of the kinesin motor protein. We  
100 generated an analogous frameshift mutation in the mouse and found that these mutant mice

101 displayed progressive, postnatal-onset hydrocephalus with cranial expansion, coupled with a  
102 reduction in the quantity of EC cilia. In addition, we observed that *kif6* mutant zebrafish also  
103 display dilation of the ventricular system, coupled with reduced EC cilia. Interestingly, we failed  
104 to observe additional PCD related defects of other multiciliated tissues in *Kif6* mutant mouse or  
105 zebrafish models. Together these results demonstrate that KIF6 function is unique and specific  
106 for EC cilia. Finally, we propose that *KIF6* represents a novel gene for neuro-cranial  
107 development and intellectual disability in humans.

108

## 109 **RESULTS**

### 110 Clinical features and mutation identification

111 We identified a Thai boy with intellectual disability and megalencephaly. His parents  
112 were first cousins. He was born at 34 weeks gestation with a head circumference of 34 cm (97<sup>th</sup>  
113 centile). APGAR scores were 7 and 9 at 1 and 5 minutes, respectively. Neonatal hypoglycemia  
114 (blood sugar of 11 mg/dL) and neonatal jaundice were treated promptly. In the first few months  
115 of life, he was found to have delayed neurodevelopment and central hypotonia. He was able to  
116 hold his head at 5 months, rolled over at 8 months, walked and had first words at 2 years old. At  
117 the age of 9 years and 9 months, an IQ test by Wechsler Intelligence Scale for Children: 4th  
118 edition (WISC-IV) revealed that his full-scale IQ was 56, indicating intellectual disability. The  
119 patient had possible seizure activity at age 10 described as parasomnias, was found to have  
120 intermittent bifrontocentral rhythmic theta activity, and the spells resolved after valproic acid  
121 therapy. His height and weight followed the curve of 50th centile, but his head circumference  
122 remained at 97th centile (53.5 cm and 55 cm at 6 and 9 years old, respectively). Physical  
123 examination was generally unremarkable except macrocephaly and low-set prominent anti-

124 helical pinnae (Fig 1A). Eye examination, hearing tests, thyroid function tests, chromosomal  
125 analysis, and nerve conduction velocity were normal. Both brain CT scans at 4 months and 8  
126 years old and brain MRI at 7 months old showed a slight dolichocephalic cranial shape (cephalic  
127 index = 75), without overt structural brain abnormalities (Fig 1B-D). X-ray analysis of the spine  
128 showed no obvious scoliosis at 10-years-old (Fig 1E).

129 To elucidate the genetic etiology, we performed homozygosity mapping, whole genome  
130 array comparative genomic hybridization (CGH), and whole exome sequencing (WES). WES  
131 identified 83 homozygous variants, which had not been reported as SNPs in dbSNP137 (S1  
132 Table). We then selected only those located within the 63 homozygous regions found by  
133 homozygosity mapping (S2 Table). Seven candidate variants (one frameshift and six missense  
134 mutations; Table I) were identified. Of the six missense, five were predicted to be either benign  
135 by Polyphen-2 or tolerated by SIFT prediction programs. The remaining variant, c.235G>A;  
136 p.V79M of the *Carboxypeptidase E (CPE)* gene, was not evolutionarily conserved among  
137 diverged species (S1 Fig). We, therefore, decided to further our study on the only candidate  
138 truncating mutation, a homozygous one base-pair deletion, c.1193delT (p.Leu398Glnfs\*2) in  
139 exon 11 of *Kinesin family member 6 (KIF6)* (NM\_001289021.2).

140 *KIF6* is located on human chromosome 6p21.2 and comprises 23 exons. The 2.4-kb *KIF6*  
141 cDNA encodes a canonical N-terminal kinesin motor domain (amino acid positions 3-353) and  
142 three coiled-coil regions (amino acid positions 358-385, 457-493, and 633-683), predicted by  
143 SMART server [20]. Segregation of the homozygous sequence variant with the disease  
144 phenotype was confirmed by Sanger sequencing (Fig 1F) and by restriction fragment length  
145 polymorphism (RFLP) analysis of the pedigree (Fig 1G), while his parents and his unaffected  
146 brother were heterozygous for the deletion (Fig 1F, G and data not shown). The deletion was not

147 observed in our 1,600 in-house Thai exomes, the 1000 Genome Database, and the ExAC  
148 Database. The pedigree combined with the novelty of the mutation in *KIF6* presented here,  
149 strongly suggest this C-terminal truncating mutation in *KIF6* may be etiologic for neuro-cranial  
150 developmental defects.

151 **Table 1. Seven candidate variants from WES and homozygosity mapping**

| # | Chromosome<br>(position) | Gene           | Zygoty     | Nucleotide<br>change | Amino acid change | Polyphen-2<br>(score)           | SIFT        |
|---|--------------------------|----------------|------------|----------------------|-------------------|---------------------------------|-------------|
| 1 | 6 (39513453)             | <i>KIF6</i>    | Homozygous | c.1193delT           | p.L398QfsX399     |                                 |             |
| 2 | 4 (166300608)            | <i>CPE</i>     | Homozygous | c.235G>A             | p.V79M            | Possibly<br>damaging<br>(0.889) | Deleterious |
| 3 | 6 (41895234)             | <i>BYSL</i>    | Homozygous | c.391C>T             | p.R131C           | Probably<br>damaging<br>(0.975) | Tolerated   |
| 4 | 7 (44120345)             | <i>POLM</i>    | Homozygous | c.359G>A             | p.R120Q           | Probably<br>damaging<br>(0.999) | Tolerated   |
| 5 | 7 (64167644)             | <i>ZNF107</i>  | Homozygous | c.962T>G             | p.I321S           | Probably<br>damaging<br>(0.969) | Tolerated   |
| 6 | 2 (96148317)             | <i>TRIM43B</i> | Homozygous | c.146C>T             | p.P49L            | Benign<br>(0.071)               | Tolerated   |
| 7 | 5 (140307142)            | <i>PCDHAC1</i> | Homozygous | c.665T>C             | p.I222T           | Benign<br>(0.001)               | Tolerated   |

152

### 153 Generation of *Kif6* Mutation in Mouse

154 To test the functional consequence of the C-terminal truncating p.L398fsX2 mutation (Fig 1H),  
155 we generated an analogous frameshift mutation in exon14 of the mouse *Kif6*

156 (ENSMUST00000162854) gene, which is ~150bp downstream of the frameshift mutation found  
157 in the patient (Fig 2A). After backcross of founder mice to C57B6/J strain, we identified a  
158 nonsense allele with scarless insertion (c.1665ins) of a 3-stop donor cassette -providing  
159 integration of an ochre termination codon in all three reading frames into the endogenous *Kif6*  
160 locus (S2 Fig). This endonuclease-mediated insertional frameshift mutation (*Kif6<sup>em1Rgray</sup>*) is  
161 predicted to truncate the C-terminal cargo-binding domain of the kinesin motor protein  
162 (p.G555+6fs). This novel mutant allele of *Kif6* (hereafter called *Kif6<sup>p.G555fs</sup>*) is predicted to  
163 encode a C-terminal truncated KIF6 protein 168 amino acids longer than is predicted for the  
164 human p.L398fsX2 variant (Fig 2A).

165

#### 166 Hydrocephalus in *Kif6<sup>p.G555fs</sup>* Mouse

167 Intercrossing *Kif6<sup>p.G555fs/+</sup>* heterozygous animals gave offspring with the expected Mendelian  
168 ratios, with typical appearance at birth. However, beginning at postnatal day (P)14-onwards,  
169 100% (n=7) of *Kif6<sup>p.G555fs/p.G555fs</sup>* homozygous mutant mice displayed classic indications of  
170 hydrocephalus including doming of the cranium (Fig 2C), a hunched appearance, and with  
171 decreased open field activity. We observed apparent megalencephaly and hemorrhaging in older  
172 (P21-P28) *Kif6<sup>p.G555fs/p.G555fs</sup>* mutant brains (Fig 2D), which likely results from increased  
173 intracranial pressure and swelling of the ventricles causing damage to the neural tissue against  
174 the cranium. At P14, the body weights were not significantly decreased in *Kif6<sup>p.G555fs</sup>* mutants  
175 (5.8±1.3 (g)rams) compared with littermate controls (7.0±1.2g) (n=5/genotype; *p*=0.17).  
176 However, at P28 mutant mice showed decreased weight on average (12.67±1.53 g) compared to  
177 littermate controls (15.33±1.15g), although this trend was not statistically significant  
178 (n=3/genotype; *p*= 0.07). At P28, extracted whole brain sizes appear to be larger in

179 *Kif6*<sup>p.G555fs/p.G555fs</sup> mutants compared to non-mutant littermate controls (Fig 2D). For these  
180 reasons, mutant animals were not maintained for observation past P28. qPT-PCR analysis of  
181 several *Kif6* exon-exon boundaries found no evidence for non-sense mediated decay in  
182 *Kif6*<sup>p.G555fs</sup> mutant mice (Fig 2B).

183 To determine whether a more N-terminal truncated *Kif6* mutation would result in a more  
184 severe hydrocephalus phenotype, we isolated a conditional-ready *Kif6* allele, where exon 4 is  
185 flanked by LoxP sites (*Kif6*<sup>tm1c</sup>) (KOMP repository, see Methods and Materials). Recombination  
186 of the *Kif6*<sup>tm1c</sup> allele is predicted to generate a frameshift mutation, which should generate a  
187 severely truncated, 89 amino acid, KIF6 protein (p.G83E+6fs) with a non-functional N-terminal  
188 motor domain. We generated a whole body conditional knockout by crossing the *Kif6*<sup>tm1c</sup> mouse  
189 to the *CMV-Cre* deleter mouse [21]. We observed postnatal-onset, hydrocephalus in *CMV-Cre*;  
190 *Kif6*<sup>tm1c/tm1c</sup> conditional mutant mice (n=10) analogous to our observations in *Kif6*<sup>p.G555fs/p.G555fs</sup>  
191 mutant mice (data not shown). Interestingly, we find no evidence of non-sense mediated decay in  
192 these mutant mice despite the generation of an early premature termination codon (data not  
193 shown). Because the onset and progression of hydrocephalus was equivalent comparing the  
194 whole-body conditional *CMV-Cre*;*Kif6*<sup>tm1c/tm1c</sup> and *Kif6*<sup>p.G555fs/p.G555fs</sup> mutant mice strains we  
195 suggest that any KIF6 protein encoded by these mutant mouse strains is likely non-functional.  
196 Given its relevance to the human mutation, the majority of experiments were all done using the  
197 *p.G555fs* allele.

198 Mouse brains were analyzed histologically by hematoxylin and eosin (H&E) stained  
199 coronal sections. Our analysis of coronal sectioned brain at P14 failed to find significance when  
200 comparing the total area in section (499.2+39.9μM (Control) vs. 552.5+50.8μM  
201 (*Kif6*<sup>p.G555fs/p.G555fs</sup>); n=7/genotype; p=0.42). However, lateral and third ventricles (LV and 3V

202 respectively) were obviously enlarged in *Kif6*<sup>p.G555fs/p.G555fs</sup> mutants (Fig 2F). Quantitation of LV  
203 volumes normalized to total brain volume confirmed ventricular expansion in *Kif6*<sup>p.G555fs/p.G555fs</sup>  
204 mutants (n= 7 for each genotype;  $p \leq 0.05$ ; Fig 2G). No obvious defects of the cortex or  
205 development of other brain regions in *Kif6*<sup>p.G555fs/p.G555fs</sup> mutant mice were apparent at a gross  
206 anatomical level (Fig 2E, F). Together these data suggest that *Kif6*<sup>p.G555fs/p.G555fs</sup> mutant mice  
207 display postnatal-onset, progressive hydrocephalus, without obvious overgrowth of neural  
208 cortex.

209

## 210 *Kif6* is Expressed Specifically in the ECs of the Mouse Brain

211 To determine the endogenous expression patterns of *Kif6* in the mouse, we isolated a *Kif6-LacZ*  
212 reporter mouse (*Kif6-LacZ*<sup>tm1b</sup>) (KOMP repository, see Methods and Materials). Hemizygous  
213 *Kif6-LacZ*<sup>tm1b/+</sup> mice appeared unremarkable and exhibited no evidence of hydrocephalus.  
214 Intercrosses of *Kif6*<sup>tm1b/+</sup> hemizygous mice failed to generate litters with *Kif6*<sup>tm1b/tm1b</sup>  
215 homozygous mice, suggesting that the homozygosity of the *lacZ* expressing allele is embryonic  
216 lethal (data not shown). At P10 and P21, *Kif6*<sup>tm1b/+</sup> transgenic mice showed *lacZ* expression  
217 throughout the ependyma of the ventricular system including the central canal. However, no  
218 *lacZ* expression was detected in the choroid plexus or in other regions of the brain (Fig 3A, A'  
219 and S3B' Fig), with the exception of a small population of cells flanking the third ventricle  
220 (arrows, S3 Fig). Interestingly at P10, other multi-ciliated tissues in these transgenic mice such  
221 as the oviduct or trachea were not labeled (Fig 3B-C'). Moreover, no laterality defects or obvious  
222 changes to trachea cilia were observed in *Kif6*<sup>p.G555fs/p.G555fs</sup> mutant mice (S6A, B Fig),  
223 suggesting that *Kif6* expression and function are tightly restricted to the multiciliated EC in

224 mouse. Taken together these data suggested a cellular mechanism centered on defective ECs  
225 underlying the development of hydrocephalus in *Kif6*<sup>p.G555fs/p.G555fs</sup> mutant mice.

226

## 227 Progressive Loss of Cilia in *Kif6*<sup>p.G555fs/p.G555fs</sup> Mutant Mice

228 Defects in ECs and their cilia are known to cause hydrocephalus in mouse [8]. To assay EC cilia,  
229 we utilized scanning electron microscopy (SEM) to directly visualize the LV. Heterozygous  
230 *Kif6*<sup>p.G555fs/+</sup> mice displayed a high-density of regularly spaced EC multiciliated tufts along the  
231 LV surface (Fig 4A-A'), typical for P21 mice [22]. In contrast, homozygous *Kif6*<sup>p.G555fs/p.G555fs</sup>  
232 mutant mice displayed a marked reduction of multiciliated tufts across the LV wall, coupled with  
233 a reduction in the density of ciliary axonemes extending from the ECs (Fig 3B-B'). The loss of  
234 EC cilia was more severe at P28 (S4 Fig). Together, these data suggested that hydrocephalus  
235 may result from either a reduction in EC differentiation and/or defects in EC cilia maintenance  
236 during postnatal development.

237 To address the differentiation status of the ECs, we utilized immunofluorescence (IF) in  
238 coronal sectioned brain tissues to image known proteins components of the EC and their cilia. At  
239 P21, we observed the expression of the ependymal cell-marker S100B [22] throughout the  
240 epithelium lining luminal surface of the ventricles, as well as, the presence of apically localized  
241  $\gamma$ -tubulin-positive basal bodies within these ECs in both WT (Fig 4C-C'') and *Kif6*<sup>p.G555fs/p.G555fs</sup>  
242 mutant mice (Fig 4D-D''). Conversely, we observed a severe reduction in the density of CD133-  
243 positive EC axonemes [23] extending into the ventricular lumen in *Kif6*<sup>p.G555fs/p.G555fs</sup> mutant mice  
244 (Fig 4C, C'''), compared with WT (Fig 4D, D'''). Quantitation of several sections from  
245 independent mice confirmed a severe reduction of CD133-positive ciliary axonemes due to the  
246 loss of KIF6 function (n=5 mice/genotype, p<0.001) (Fig 4E). These results suggest that the



247 onset of hydrocephalus in *Kif6* mutant mice is primarily due to the loss of EC ciliary axonemes  
248 and not the result of defects in the differentiation of these cells.

249

## 250 Ventricular Dilation and Reduced EC Cilia in *kif6* Mutant Zebrafish

251 Previous studies in *kif6*<sup>sko/sko</sup> mutant zebrafish found late-onset scoliosis, without obvious  
252 hydrocephalus or defects in EC cilia during early embryonic development [19]. Interestingly,  
253 reduced CSF flow, ventricular dilation, and loss of EC cilia during larval zebrafish development  
254 is associated with scoliosis [24]. In order to determine if *kif6* mutant zebrafish display changes in  
255 the ventricular system later in adults, we used iodine contrast-enhanced, micro computed  
256 tomography ( $\mu$ CT) [25] to generate high-resolution (5  $\mu$ M) images of the intact zebrafish brain.  
257 After reconstruction and alignment of 3D tomographic datasets in the coronal plane, we utilized  
258 stereotyped landmarks of the zebrafish brain and spinal cord [26] to compare equivalent axial  
259 sections of aged matched (90 days post fertilization (dpf)) *kif6*<sup>sko/+</sup> heterozygous and *kif6*<sup>sko/sko</sup>  
260 homozygous mutant zebrafish. At each axial level of the brain (Fig 5A), we observed consistent  
261 dilation of the ventricular system and central canal in *kif6*<sup>sko/sko</sup> homozygous mutant zebrafish  
262 (yellow arrows; Fig 5C, E, G), compared to a stereotyped anatomy of the wild-type (WT)  
263 zebrafish brain (Fig 5B, D, F). Multiple regions of *kif6*<sup>sko/sko</sup> mutant zebrafish brain were found to  
264 be structurally abnormal in *kif6*<sup>sko/sko</sup> mutants compared to WT zebrafish (S1, 2 Movies). We next  
265 quantified the areas of two anatomically distinctive ventricles in our tomographic datasets: (i) the  
266 tectal ventricle (TecV) and (ii) a region of the rhombencephalic ventricle (RV) just posterior to  
267 the lobus facialis [26]. We found that both the TecV and the posterior RV were significantly  
268 more dilated in *kif6*<sup>sko/sko</sup> mutant zebrafish comparing several optical sections from independent  
269 aged-matched zebrafish (n=3 fish/genotype;  $p < 0.0001$ ). The central canal was also clearly

270 dilated in *kif6*<sup>sko/sko</sup> mutant zebrafish (yellow arrow, Fig 5G). However, we were unable to  
271 reliably quantify this area in WT samples at the current resolution. Our previous observations in  
272 *kif6*<sup>sko/sko</sup> mutant zebrafish embryos failed to find phenotypes that are characteristic of cilia  
273 defects, such as hydrocephalus, *situs inversus*, or kidney cysts [19]. Moreover, we observed  
274 normal development and function of EC cilia in the central canal in embryonic mutant zebrafish  
275 [19]. These data, together with our new observations of ventricular dilation in adult *kif6* mutants  
276 (Fig 5), suggest that Kif6 is required for the post-embryonic maintenance of the EC cilia as was  
277 observed in other zebrafish mutants displaying similar scoliosis as observed in *kif6* mutant  
278 zebrafish [19, 24].

279 In order to assay whether EC cilia were affected in adult (90dpf) *kif6*<sup>sko/sko</sup> mutant  
280 zebrafish, we isolated a stable transgenic allele, *Tg(Foxj1a:GFP)<sup>dp1</sup>* which effectively labels  
281 multiple multiciliated *Foxj1a*-positive cell lineages, including ECs, with cytoplasmic EGFP in  
282 zebrafish [24]. We observed no differences in the specification of *Foxj1a:GFP*-positive ECs  
283 comparing WT and homozygous *kif6*<sup>sko/sko</sup> mutant fish (Fig 5I, J). Cytoplasmic GFP can freely  
284 diffuse into and label the ciliary axoneme [27]. As such, we were able to observe GFP-positive  
285 EC cilia projecting into the ventricular lumen in *Tg(Foxj1a:GFP)<sup>dp1</sup>; kif6*<sup>sko/+</sup> heterozygous fish  
286 (red arrowheads; Fig 5I). In contrast, these GFP-labeled EC cilia were reduced or absent in  
287 *Tg[Foxj1a:GFP]<sup>dp1</sup>; kif6*<sup>sko/sko</sup> mutant fish (Fig 5J, K). Furthermore, SEM analysis of the  
288 ventricles in *kif6*<sup>sko/sko</sup> mutant zebrafish further supported our observations of ventricular dilation  
289 and loss of EC cilia in adult *kif6*<sup>sko/sko</sup> mutant fish (S5 Fig). Akin to our observations in *Kif6*  
290 mutant mice trachea, we did not observe defects of other multiciliated tissues such as the nasal  
291 cilia (S6C, D Fig) in *kif6*<sup>sko/sko</sup> mutant zebrafish. Together, these data suggest that Kif6 functions  
292 specifically in the maintenance of EC cilia as well as for ventricular homeostasis in zebrafish.

293

## 294 DISCUSSION

295 This study demonstrates the importance of *KIF6* for neuro-cranial development in  
 296 vertebrates, and a unique and highly specialized role in ependymal cells where its function is  
 297 important for maintenance of EC cilia. This is supported by several lines of evidence including  
 298 the discovery of a novel nonsense-mutation of *KIF6* in a child with neuro-cranial defects and  
 299 intellectual disability and underscored by functional analysis in both mouse and zebrafish *Kif6*  
 300 mutant models (Table 2).

301 **Table 2. KIF6 mutations discussed in this paper.**

| ID/Allele                                | Species   | Nucleotide change  | Amino acid change           | Phenotype reported                                                                                  | Reference       |
|------------------------------------------|-----------|--------------------|-----------------------------|-----------------------------------------------------------------------------------------------------|-----------------|
| Patient                                  | Human     | c.1193delT         | p.L398QfsX399               | Delayed neurodevelopment and central hypotonia, neuro-cranial defects, and intellectual disability. | this work       |
| <i>Kif6</i> <sup>p.G555fs/p.G555fs</sup> | Mouse     | c.1665ins          | p.G555+6fs                  | Severe progressive hydrocephalus, loss of ependymal cell cilia                                      | this work       |
|                                          | Mouse     | deletion of exon 4 | p.E83+39fs                  | Severe progressive hydrocephalus, loss of ependymal cell cilia                                      | this work       |
| <i>Kif6</i> <sup>Δ3/Δ3</sup>             | Mouse     | c.177-251_del      | p.Lys59Asn, Phe60_Ser84_del | None reported                                                                                       | [28]            |
| <i>kif6</i> <sup>sko/sko</sup>           | Zebrafish | c.205C>A           | p.Tyr53X                    | Larval onset scoliosis, hydrocephalus, loss of ependymal cilia                                      | [19], this work |

302

303 We identified a homozygous *KIF6* c.1193delT mutation in a child with macrocephaly  
 304 and cognitive impairment that segregated with this phenotype in his family, and leads to a loss of  
 305 the C-terminal second and third coiled-coil regions which are important for dimerization and  
 306 cargo selectivity of kinesin motors [13]. We engineered an analogous, C-terminal truncating  
 307 mutation of *KIF6* in mouse, which displays severe hydrocephalus and defects of EC cilia

308 providing strong evidence for pathogenicity of the mutation in the child. Other than the case  
309 described here, no prior mutation directly attributed to human disease has been described for  
310 *KIF6*. Taken together, the clinical data reported here suggest that biallelic mutations in *KIF6*  
311 may underlie some unexplained intellectual disability and neuro-cranial developmental defects.  
312 Future analyses of *KIF6* mutations in these patient groups are warranted.

313 Further, our analysis of several independent loss-of-function *Kif6* mutant animal models  
314 found no evidence of obvious heart abnormalities to explain the prior association of the common  
315 variant *KIF6* p.W719R in some [17], but not all [18], studies of coronary heart disease in humans.  
316 Because expressed sequence tag clones of *KIF6* have not been reported from cDNAs libraries  
317 derived from human heart or vascular tissues (UniGene 1956991 - Hs.588202), any possible  
318 functional effects of KIF6 on heart function remains unexplained. However, detailed analysis of  
319 coronary function was not explored in our models, therefore it is possible that subtle defects may  
320 be present.

321 An ENU-derived *Kif6* splice acceptor site mutant mouse strain, predicted to delete the 3rd  
322 exon of *KIF6* (*Kif6*<sup>Δ3/Δ3</sup>), also did not show cardiac or lipid abnormalities [28]. Of note this  
323 mutant mouse was also not reported to have hydrocephalus. Our analysis shows that the loss of  
324 exon 3 in *Kif6*<sup>Δ3/Δ3</sup> mutant mouse generates an inframe deletion of only 25 amino acids in the N-  
325 terminal motor domain of the KIF6 protein, otherwise generating a mostly full-length KIF6  
326 protein (Table 2). In contrast, here we report two novel *Kif6* mutant mice: (i) a C-terminal  
327 *Kif6*<sup>p.G555fs/p.G555fs</sup> deletion mutant, predicted to truncate 248 amino acids of the C-terminal  
328 domain, which are important for cargo binding in Kinesin motor proteins [13]; and (ii) a  
329 conditional *CMV-Cre;Kif6*<sup>tm1c/tm1c</sup> mutant which recombines exon 4 leading to an early frame  
330 shift mutation predicted to generate a N-terminal truncated 122 amino acid KIF6 protein (Table

331 2), both of which display indistinguishable progressive, hydrocephalus. The most parsimonious  
332 explanation for the difference in phenotypes in these mutant mice is that the *Kif6*<sup>A3</sup> allele encodes  
333 a functional KIF6 protein. Analysis of these mutations in trans or quantitative analysis of these  
334 kinesin motor proteins *in vitro* is warranted to more fully address these conflicting observations.

335 There are marked differences in the phenotypes among the human, mouse, and zebrafish  
336 associated with mutations in *KIF6*. For example, *kif6* mutant zebrafish display post-natal onset  
337 scoliosis, mirroring adolescent idiopathic scoliosis (IS) in humans [29]. The formation of IS-like  
338 defects in zebrafish has been shown to be the result of a loss of CSF flow, associated with a loss  
339 of EC cilia and ventricular dilation during a defined window of larval zebrafish development  
340 [24]. Interestingly, we did not observe scoliosis in the *Kif6* mutant mice (S7 Fig), despite being  
341 of an appropriate age when IS-like scoliosis can manifest in mouse [30]. Moreover, we do not  
342 observe scoliosis in the patient at the age of 10 years, though it is possible that he may yet  
343 develop scoliosis during adolescence. The mechanism behind these differences may reflect  
344 distinctions in the functional input of the ventricular system for spine stability amongst teleosts  
345 and amniotes.

346 Furthermore, while we observe a clear role for KIF6 in maintaining the ventricular  
347 system in mouse and zebrafish, the patient does not have obvious hydrocephalus. However, his  
348 relative macrocephaly and slightly enlarged ventricles by MRI (Fig 1B-D) may suggest an  
349 element of what is commonly referred to as arrested hydrocephalus [31]. The contribution of EC  
350 cilia beating to bulk CSF flow might be species dependent. For instance, the majority of CSF  
351 flow in humans is thought to occur via the generation of a source-sink gradients; partly from the  
352 secretion of the choroid plexus and exchanges of the interstitial fluids, coupled with absorption at  
353 the arachnoid villi and lymphatics [32]. In contrast, localized or near-wall CSF flow [4],

354 generated by polarized beating of EC cilia, are clearly important for the formation of  
355 hydrocephalus in rodents [8]; however, there have been limited examples EC cilia defects  
356 causing hydrocephalus in humans. Regardless there is growing evidence suggesting that EC cilia  
357 dependent CSF flow is crucial for the regulation of brain function and neurogenesis [4], and for  
358 adult neural stem cell proliferation [9]. It is possible that a specific loss of EC cilia in humans  
359 may only have minor effects on CSF bulk flow and ventricular homeostasis, while causing  
360 severe defects of neurogenesis leading to intellectual disability and other neurological disease. It  
361 will be important to determine if the loss of KIF6 function in adulthood will contribute to  
362 changes in neurodevelopment and behavior, cognitive decline, and ventricular homeostasis.

363 Finally, *KIF6* now joins five other kinesin genes, *KIF1C*, *KIF2A*, *KIF4A*, *KIF5C* and  
364 *KIF7* that were previously reported to be associated with neurological abnormalities in humans  
365 [33-36]. Here we suggest that *KIF6* has a uniquely specific function in the EC cilia in  
366 vertebrates, resulting in both cognitive impairment and macrocephaly in a child with a  
367 homozygous one-base pair deletion. Using a cell biological approach, we identified specific loss  
368 of EC cilia in *Kif6* mutant models in both mouse and zebrafish, suggesting a strong conservation  
369 of KIF6 function in ventricular system in vertebrates.

370

371

## 372 **Material and Methods**

### 373 Identification of Mutation in Patient 1

#### 374 Whole Exome Sequencing (WES)

375 The patient's genomic DNA of patient was extracted from peripheral blood leukocyte using  
376 AchivePure DNA Blood Kit (5 Prime Inc., Gaithersburg, MD). The sample was sent to Macrogen,  
377 Inc. (Seoul, Korea) for whole exome sequencing. The 4 ug of DNA sample was enriched by TruSeq  
378 Exome Enrichment Kit and was sequenced onto Hiseq 2000. The raw data per exome was mapped  
379 to the human reference genome hg19 using CASAVA v1.7. Variants calling were detected with  
380 SAMtools.

381

#### 382 Homozygosity mapping

383 The sample was sent to Macrogen, Inc. (Seoul, Korea) for genotyping. The DNA sample was  
384 genotyped by HumanOmni 2.5-4v1 DNA BeadChip (Illumina) which contain 2,443,177 SNPs.  
385 The experiment was performed by the array protocol. PLINK was used to analyze for the  
386 homozygous regions.

387

#### 388 Mutation analysis

389 We performed resequencing of *KIF6* pathogenic region in patient and patient's family.  
390 Primers for the amplification of the candidate variant were designed using Primer 3 software  
391 (version 0.4.0). Primers KIF6-1193delT-F 5'-CAGCTTGAACATGGCTGAAA-3' and KIF6-  
392 1193delT-R 5'-TTCTGTAAAGAGGTGGGAACAA-3' were used to amplify. The 20 ul of PCR  
393 reaction contained 50-100 ng of genomic DNA, 200 uM of each dNTP, 150 nM of each primer,  
394 1.5 mM MgCl<sub>2</sub> and 0.5 unit of Taq DNA polymerase (Fermentas Inc., Glen Burnie, MD). The

395 PCR condition was started with 95 °C for 5 min for pre-denaturation following with the 35 cycles  
396 of 94 °C for 30 sec, 55 °C for 30 sec and 72 °C for 30 sec. The product size of these primers is 276  
397 bp. For sequencing, PCR products were treated with ExoSAP-IT (USP Corporation, Cleveland,  
398 OH), and sent for direct sequencing at MacroGen Inc. (Seoul, Korea). Bi-directional sequencing  
399 was done by using KIF6-1193delT F and R primers. Analyses were performed by Sequencher 4.2  
400 (Gene Codes Corporation, Ann Arbor, MI).

401

## 402 PCR-RFLP

403 One hundred chromosomes and patient's trio were genotyped by PCR-RFLP. Primer KIF6  
404 *MfeI* F 5'-TGGCTTCACTATAAATTTCACTTTGTCAATG-3' and mutagenic primer KIF6  
405 mutagenic *MfeI* R 5'-TCCTGGTCTTCCAAAAAGGATGCAAT-3' were used to amplify KIF6  
406 T-deletion. The 20 ul of PCR reaction contained 50-100 ng of genomic DNA, 200 uM of each  
407 dNTP, 150 nM of each primer, 1.5 mM MgCl<sub>2</sub> and 0.5 unit of Taq DNA polymerase (Fermentas  
408 Inc., Glen Burnie, MD). The PCR condition was started with 95 C for 5 min for pre-denaturation  
409 following with the 35 cycles of 94 C for 30 sec, 60 C for 30 sec and 72 C for 30 sec. The product  
410 size of these primers is around 223 bp. The PCR product was incubated with 10U of *MfeI*-HF (New  
411 England Biolabs, Ipswich, MA) at 37 C overnight. Three percent of agarose gel electrophoresis  
412 was used to detect the different cut sizes of PCR product. A 196 bp and 26 bp bands were present  
413 in one base deletion sample.

414

## 415 Mice

416 All mouse studies and procedures were approved by the Animal Studies Committee at the  
417 University of Texas at Austin (AUP-2015-00185). The *Kif6*<sup>G555fs</sup> mutant mouse were developed



418 using CRISPR-Cas9-mediated genome editing. Using the CHOP-CHOP online tool [37], we  
419 identified a suitable 20-nucleotide site (GGAGATGTCACTGGGACGCC) targeting exon 14 of  
420 mouse *Kif6* (ENSMUST00000162854.1) in order to generate a C-terminal truncation allele. The  
421 gene specific and universal tracrRNA oligonucleotides (S3 Table) were annealed, filled in with  
422 CloneAmp HiFi PCR premix, column purified, and directly used for *in vitro* transcription of  
423 single-guide RNAs (sgRNAs) with a T7 Polymerase mix (M0255A NEB). All sgRNA reactions  
424 were treated with RNase free-DNase. We utilized a ssDNA oligo (S3 Table) to insert a  
425 frameshift mutation in all three reading frames, along with 8-cutter restriction sites for  
426 genotyping (3-stop donor) [38] (Fig S2). The *Kif6* ex14 3-stop donor and mKif6-R2-ex14-T7  
427 sgRNA were submitted for pronuclear injection at the University of Texas at Austin Mouse  
428 Genetic Engineering Facility (UT-MGEF) using standard protocols  
429 (<https://www.biomedsupport.utexas.edu/transgenics>). We confirmed segregation of the  
430 *Kif6*<sup>p.G555fs</sup> allele using several methods including increased mobility on a high percentage  
431 electrophoresis gel, donor-specific primer PCR, or PmeI (NEB) digestion of the *Kif6* exon14  
432 amplicon (S2 Fig and S3 Table). PCR products in isolated alleles were cloned to pCRII TOPO  
433 (ThermoFisher) to identify scarless integration of the 3-stop donor at the *Kif6* locus using gene  
434 specific flanking primers (S3 Table).

435 *Kif6-LacZ*<sup>tm1b</sup> mice were generated by injection of embryonic stem cell clones obtained  
436 from the Knockout Mouse Project (KOMP) Repository. Three *Kif6*<sup>tm1a(KOMP)Mbp</sup> embryonic stem  
437 (ES) cell clones (KOMP: EPD0736\_3\_G01; EPD0736\_3\_H02; and EPD0736\_3\_A03) all  
438 targeting exon 4 of the *Kif6* gene with a promoter-driven targeting cassette for the generation of a  
439 'Knockout-first allele' [39]. Pronuclear injections of all clones were done using standard  
440 procedures established by the UT MGEF. After screening for germline transmission, we isolated

441 and confirmed a single heterozygous founder male ( $Kif6^{tm1a(KOMP)Mbp}$ ) carrier derived from the  
442 G01 clone. We confirmed the locus by long-range PCR, several confirmation PCR strategies  
443 targeting specific transgene sequences, and Sanger sequencing of the predicted breakpoints (S3  
444 Table). After several backcrosses to the WT C57BL/6J substrain (JAX), we crossed a  
445 hemizygous  $Kif6^{tm1a/+}$  mutant male to a homozygous  $CMV-Cre$  female ( $B6.C-Tg(CMV-$   
446  $cre)1Cgn/J$ ) (JAX, 006054) to convert the  $Kif6^{tm1a}$  allele to a stable LacZ expressing  $Kif6^{tm1b}$   
447 allele ( $Kif6-LacZ^{tm1b}$ ). Mutant F1 offspring from this cross were backcrossed to WT C57BL6/J  
448 mice and the F2 progeny were genotyped to confirm the  $Kif6-LacZ^{tm1b}$  allele and the  
449 presence/absence of the CMV-Cre transgene. A single founder  $Kif6-LacZ^{tm1b}$  with the desired  
450 genotype ( $Kif6-LacZ^{tm1b}$  hemizygous, Cre transgene absent) was used to expand a colony for  
451 spatial expression analysis.

452  $Kif6^{tm1c}$  conditional ready mice were generated by outcross of the  $Kif6^{tm1a(KOMP)Mbp}$  allele  
453 described above to a ubiquitously expressed Flippase strain ( $129S4/SvJaeSor-$   
454  $Gt(ROSA)26Sor^{tm1(FLP1)Dym/J}$ ) (JAX, 003946). F1 offspring were genotyped and sequenced at  
455 several breakpoints to ensure proper flip recombination and a single F1 founder was used to  
456 backcross to C57B6/J for propagation of the  $Kif6^{tm1c}$  strain. Analysis of recombination of the  
457 floxed  $Kif6^{tm1c}$  was performed by crossing homozygous  $Kif6^{tm1c/tm1c}$  to a compound heterozygous  
458  $CMV-Cre; Kif6^{tm1c/+}$  mouse. Recombination of the exon 4 of  $Kif6$  was confirmed by PCR-gel  
459 electrophoresis analysis (S3 Table).

#### 460 LacZ Staining Protocol

461 Mice were perfused with LacZ fixative and post fixed for 2 hours at RT. Whole brains were then  
462 stained in X-gal solution overnight at 37°C followed by post-fixation in 4% PFA overnight at

463 4°C. The samples were then prepped for cryosectioning in 30% sucrose/OCT and sectioned.

464 Sections were counter stained in Nuclear Fast Red stain (Sigma).

465

## 466 X-ray Analyses of Mice

467 Radiographs of the mouse skeleton were generated using a Kubtec DIGIMUS X-ray system

468 (Kubtec, T0081B) with auto exposure under 25 kV.

469

## 470 Zebrafish Manipulations and Transgenesis

471 All zebrafish studies and procedures were approved by the Animal Studies Committee at the

472 University of Texas at Austin (AUP-2015-00187). Adult zebrafish of the AB were maintained

473 and bred as previously described [40]. Individual fish were used for analysis and compared to

474 siblings and experimental control fish of similar size and age. Independent experiments were

475 repeated using separate clutches of animals. Strains generated for this study: Tg(Foxj1a:GFP)<sup>dp1</sup>.

476 Previously published strains: *kif6*<sup>sko</sup> [19]. Transgenic lines were generated using the Tol2-system

477 as described before [41].

478

## 479 Mouse and Zebrafish Perfusions and Embedding of Brain Tissues

480 Mice were humanely euthanized by extended CO<sub>2</sub> exposure and transferred to chemical hood

481 where the mouse was perfused with buffered saline followed by 4% PFA. Whole brains were

482 placed in 4% PFA 4 hours at RT, then at 4° C overnight. Zebrafish were euthanized by exposure

483 to lethal, extended dose of Tricane (8%) followed by decapitation. Zebrafish brains were

484 extracted and fixed in 4% PFA at 4° C overnight. For paraffin embedding, the fixed brains were

485 embedded and cut using standard paraffin embedding and sectioning protocols. Paraffin sections  
486 were stained with standard hematoxylin-eosin solution.

487 For frozen sections both mouse or zebrafish brains were fixed as above and then  
488 equilibrated to 30% or 35% sucrose, respectively at 4° C overnight. Whole brains were then  
489 placed in O.C.T. Compound (Tissue-Tek) and flash in cold ethanol bath. All blocks were stored  
490 at -80° Celsius until sectioning on a cryostat (Leica). All sections were dried at RT for ~2hrs. and  
491 stored at -80°C until use.

492

### 493 Immunofluorescence Protocol for Frozen Brain Sections

494 Sectioned tissues were warmed at room temperature for ~1 hour, then washed thrice in 1xPBS +  
495 0.1% Tween (PBST). Antigen retrieval was hot citrate buffer (pH6.8). Blocking was done in  
496 10% Normal goat serum (Sigma) in 1xPBST. Primary antibodies (S100B at 1:1,000, ab52642,  
497 Abcam; CD133(Prominin-1), 134A, 1/500; Gamma Tubulin, sc-17787, Santa Cruz (C-11),  
498 1/500; Anti-GFP, SC9996, Santa Cruz, 1:1,000) were diluted in 10% NGSS, 1xPBST and  
499 allowed to bind overnight at 4°C in a humidified chamber. Secondary fluorophores (Alexa Fluor  
500 488(A-11034); 568(A10042); and 647(A32728), 1:1,000, ThermoFisher) were diluted in 10%  
501 NGS; 1xPBST were allowed to bind at RT for ~1hr. We used Prolong gold with DAPI (Cell  
502 Signaling Technologies, 8961) to seal coverslips prior to imaging.

503

### 504 Iodine-contrast $\mu$ CT

505 Zebrafish specimens were fixed overnight in 10% buffered formalin, washed thrice in diH<sub>2</sub>O and  
506 stained ~48 hours in 25% Lugol's solution/75% distilled water. Specimens were scanned by the  
507 High-resolution X-ray CT Facility (<http://www.ctlab.geo.utexas.edu/>) on an Xradia at 100kV,

508 10W, 3.5s acquisition time, detector 11.5 mm, source -37 mm, XYZ [816, 10425, -841], camera  
509 bin 2, angles  $\pm 180$ , 1261 views, no filter, dithering, no sample drift correction. Reconstructed  
510 with center shift 5.5, beam hardening 0.15, theta -7, byte scaling [-150, 2200], binning 1, recon  
511 filter smooth (kernel size = 0.5).

512

### 513 Statistical Analysis and image measures

514 GraphPad Prism version 7.0c for Mac (GraphPad Software) was used to analyze and plot data.

515 Images for measurement were opened in FIJI (Image J) [42], and measures were taken using the

516 freehand tool to draw outlines on ventricular area or whole brain area. Statistically significant

517 differences between any two groups were examined using a two-tailed Student's t-test, given

518 equal variance. P values were considered significant at or below 0.05.

519

520 **ACKNOWLEDGMENTS**

521 We thank members of the Gray and Wallingford labs for helpful discussions and critical reading  
522 of the manuscript. We would also like to thank Jin Xiang Ren and William Shawlot for help with  
523 mouse engineering, Terry Heckmann and Ryoko Minowa for excellent technical support. We  
524 thank Jessie Maisano for her help and expertise with iodine-contrast  $\mu$ CT for this study. This  
525 study was supported (V.S.) by the Thailand Research Fund (DPG6180001) and the  
526 Chulalongkorn Academic Advancement into Its 2nd Century Project. The research of M.K. was  
527 supported in part by the Provost Graduate Excellence Fellowship, Institute of Cell and Molecular  
528 Biology, University of Texas at Austin. The research of R.S.G. was supported start-up funds  
529 from the University of Texas at Austin Dell Medical School and by a NIH grant R01AR072009.  
530

## 531 **Figure Legends**

532 **Fig 1. *KIF6* mutation in a child with intellectual disability.** (A) A low-set prominent anti-  
533 helical left pinna. (B) MRI of the brain at 7 months old shows dolichocephaly with a normal  
534 brain structure. (C) and (D) CT of the brain at 8 years old, sagittal and axial views, respectively  
535 show dolichocephalic shape of the cranium (cephalic index = 75) without demonstrable  
536 intracranial abnormality. (E) X-ray of the spine shows no scoliosis (F) Electropherograms of the  
537 patient, a control, and the patient's father in the upper, middle and lower panels, respectively.  
538 The patient is homozygous while his father is heterozygous for the c.1193delT. (G) Pedigree and  
539 RFLP, using MfeI restriction enzyme: Lane M = 100 bp marker. The arrow head indicates the  
540 500 bp band. Lanes 1-5 are controls. Lanes 6 and 7 are the proband's father and mother,  
541 respectively, showing that they are heterozygous. Lane 8 is the proband showing that he is  
542 homozygous for the c.1193delT. (H) Representative *KIF6* structure. The arrow shows the  
543 position of the c.1193delT mutation.

544

545 **Fig 2. *Kif6*<sup>p.G555fs</sup> mutant mice display progressive hydrocephaly.** (A) Schematic of the non-  
546 sense mutation in the patient (*KIF6*<sup>p.L398fsX2</sup>) and the mouse mutation (*Kif6*<sup>p.G555fs</sup>), both predicted  
547 to truncate the C-terminal domain of *KIF6* protein. (B) Fold change qRT-PCR of *Kif6* expression  
548 using cDNA libraries derived from lateral ventricles from WT (black bars) and *Kif6*<sup>p.G555fs/p.G555fs</sup>  
549 (gray bars) mutant mice. (C) Lateral X-rays of mouse cranium at P14 and P28 showing the  
550 progressive cranial expansion in *Kif6*<sup>p.G55/p.G555fs</sup> homozygous mutant mice. (D) Ventral view of  
551 whole mouse P28 brain to highlight hemorrhaging and slight enlargement of total brain size in  
552 *Kif6*<sup>p.G55/p.G555fs</sup> homozygous mutant mice. (E, F) H&E stained coronal sections of the mouse  
553 brain (P14), showing dilation of the lateral (LV) and third (3V) ventricles in *Kif6*<sup>p.G55/p.G555fs</sup>

554 homozygous mutant mice (F). (G) Quantitation of ventricular area over total brain area in  
555 *Kif6*<sup>p.G55/p.G555fs</sup> homozygous mutant mice and heterozygous littermate controls (n=7 mice per  
556 genotype; two-tailed t-test; p=0.0173). Scale bars: 1cm in (C); 5mm in (D); and 300 μM in (F,  
557 F).

558

559 **Fig 3. *Kif6-LacZ* expression is specific to the ependymal cells.** (A-C') Representative LacZ  
560 staining in a variety of multiciliated tissues from P10 *Kif6-LacZ*<sup>tm1b/+</sup> transgenic mice. (A, A')  
561 Coronal section at the 4<sup>th</sup> ventricle showing specific *LacZ* expression in the ependymal cell (EC)  
562 layer and stark lack of expression in the choroid plexus (CP) or surrounding neuronal tissues. (B,  
563 B') Sectioned oviduct tissue shows no *LacZ* expression. (C, C') Sectioned trachea tissue shows  
564 no *LacZ* expression. Scale bars: 300μM in (A-C); and 20μM in (A'-C').

565

566 **Fig 4. *Kif6* mutant mice have a reduction in ependymal cell cilia.** (A-B') SEM of the lateral  
567 ventricular wall (*en face* view) in *Kif6*<sup>p.G55/p.G555fs</sup> homozygous mutant mice and heterozygous  
568 littermate controls at P21, showing a reduction in the number and density of EC cilia tufts. (C-  
569 D'') Immunofluorescence of the wild-type (WT) and *Kif6*<sup>p.G55/p.G555fs</sup> homozygous mutant mice  
570 at P21. (C-D) Three color merge of (C', D') αS100B (ependymal cells; magenta) channel; (C'',  
571 D'') α-γ-tubulin (basal bodies; cyan) channel; and (C''', D''') αCD133 (prominin-1; green). (C',  
572 D') αS100B staining showing no changes in ependymal cell specification between *Kif6*<sup>p.G55/  
573 p.G555fs</sup> homozygous mutant and WT mice. (C'', D'') α-γ-tubulin staining showing typical basal  
574 body positioning at the apical surface of ECs in both *Kif6*<sup>p.G55/p.G555fs</sup> homozygous mutant and  
575 WT mice. (C''', D''') αCD133 staining reveals a marked of EC cilia projecting into the ventricular  
576 lumen in *Kif6*<sup>p.G55/p.G555fs</sup> homozygous mutant mice compared to WT mice. (E) Quantitation of



577 fluorescent intensity of the CD133 channel (ciliary axonemes) as the average line scan value  
578 along the lumal surface of mouse ventricles. Scale bars: 20 $\mu$ M in (A, B); 2  $\mu$ M in (A', B'); and  
579 20  $\mu$ M in (C-D''').

580

581 **Fig 5. *kif6* mutant zebrafish display dilation of the ventricular system and loss of**  
582 **ependymal cell cilia.** (A) Schematic of adult zebrafish brain highlighting the relative sectioning  
583 of the zebrafish brain. (B-G) Coronally aligned, optical sectioning of Iodine-contrasted  $\mu$ CT  
584 imaging datasets of WT (B, D, F) and *kif6*<sup>sko/sko</sup> homozygous mutant (C, E, G) zebrafish brain at  
585 90dpf. (B-C) The medial region of the TeO showing the TecV which is dilated in *kif6*<sup>sko/sko</sup>  
586 mutant fish (C) compared to age-matched WT (B). (D-E) Sectioning at the region of the medulla  
587 oblongata posterior to the lobus facialis showing dysmorphogenesis and deepening of the RV in  
588 *kif6*<sup>sko/sko</sup> mutants (E) compared with WT (D) zebrafish. (F-G) Spinal cord sectioning showing  
589 dilation of the Cc in *kif6*<sup>sko/sko</sup> mutant (G) compared to WT (F) zebrafish. Scale Bars: 1mm in (B-  
590 G); and 20  $\mu$ M in (I, J). (H) Quantitation of the area of the TecV and the RV posterior to the  
591 lobus facialis (pos. RV) in WT and *kif6*<sup>sko/sko</sup> mutant zebrafish, highlighting the consistent  
592 dilation in *kif6*<sup>sko/sko</sup> mutants (n=11 sections/genotype; two-tailed t-test; \*\*\*\*, p<0.0001). (I-J)  
593 Immunofluorescence of *Tg[foxl1a::GFP]* in both heterozygous and homozygous *kif6*<sup>sko/sko</sup>  
594 mutant zebrafish stained with  $\alpha$ GFP (green) and DAPI (blue) showing GFP positive ECs in both  
595 genotypes. However, *kif6*<sup>sko/+</sup> heterozygous zebrafish display numerous apical tufts of cilia (red  
596 arrows) projecting into the ventricle lumen, which are markedly reduced in *kif6*<sup>sko/sko</sup> mutant  
597 zebrafish. Scale Bars: 1mm in (B-G); and 20  $\mu$ M in (I, J). *TecV*-tectal ventricle *TeO*-tectum  
598 *opticum*; *CCe*-corpus cerebelli; *RV*- rhombencephalic ventricle ventricle; and *Cc*-central canal.

599

600

## 601 **Supporting Information**

602 **S1 Fig Clustal Alignment of CPE (p.V79M) variant.** Hs, *Homo sapiens*; Pt, *Pan troglodytes*;  
603 Mc, *Macaca mulatta*; Mu, *Mus musculus*; Rn, *Rattus norvegicus*; Bt, *Bos Taurus*; Cl, *Canis lupus*  
604 *familiaris*; Oc, *Oryctolagus cuniculus*; Gg, *Gallus gallus*; Dr, *Danio rerio*; Tn, *Tetraodon*  
605 *nigroviridis*; Xt, *Xenopus (Silurana) tropicalis*; Tc, *Tribolium castaneum*; Ce, *Caenorhabditis*  
606 *elegans*; Sk, *Saccoglossus kowalevskii*.

607

608 **S2 Fig *Kif6*<sup>p.G555fs</sup> generation and genotyping.** (A) Schematic of target cut site and insertion  
609 cassette into exon 14 of *Kif6* locus. Insertion cassette contains three stop codons, one in each  
610 reading frame, and two 8 basepair restriction enzyme cut sites for easy genotyping. (B-C)  
611 Agarose gels of PCR products confirming germline transmission of donor cassette in F<sub>1</sub>  
612 generation from CRISPR injected chimeras. (B) RE digest of PCR product from exon 14  
613 flanking target site, shows cutting (asterisks) in heterozygous F1 mice. Wildtype band (arrow)  
614 appears in lane one and all the subsequent lanes. (C) PCR product from donor specific primer  
615 and *Kif6* exon 14 reverse primer confirming donor insertion and germline transmission. (D)  
616 Table describing CRISPR injected mice, number with detectable indels, total with integration of  
617 donor oligo, and total displaying hydrocephaly of chimeric injected CRISPR mice. (E) Germline  
618 transmission of donor cassette from chimeric CRISPR F0 mice to F1 generation.

619

620 **S3 Fig *LacZ* expression in different ages of *Kif6-LacZ*<sup>tm1b</sup> transgenic mouse brain.** (A-A'')

621 Coronal sections of P21 mouse brains showing *LacZ* staining restricted to the EP cell layer in the  
622 4<sup>th</sup> ventricle. Zoom in shows *LacZ* positive cells have cilia projecting into the lumen (arrows).

623 (B-B') Coronal sections of P21 mouse brains showing LacZ staining of ventral portion of 3<sup>rd</sup>  
624 ventricle. (B') Some sporadic staining appearing in the nuclei of the hypothalamus (arrows). (C-  
625 C') LacZ staining in the fourth ventricle at P10 showing staining specific to ependymal cell  
626 layer.

627

628 **S4 Fig SEM of lateral ventricle in *Kif6*<sup>p.G555fs/p.G555fs</sup> mutant and control at P28.** SEM of *Kif6*  
629 wildtype vs. *Kif6*<sup>p.G555fs/p.G555fs</sup> mutants shows *Kif6* mutants show a complete loss of ependymal  
630 cell cilia on the lateral wall by P28. Scale bar 10μM.

631

632 **S5 Fig SEM of ventricle in *kif6*<sup>sko/sko</sup> mutant zebrafish display dilation of the ventricular**  
633 **system and loss of ependymal cell cilia.** SEM of zebrafish brain shows dilation of brain  
634 ventricles indicative of hydrocephaly. Higher magnification images reveal loss of ependymal cell  
635 cilia tufts in *kif6* zebrafish mutants when compared with heterozygous counterparts. Scale bars  
636 20μM and 200μM.

637

638 **S6 Fig Immunofluorescence (IF) of *Kif6* mutant multiciliated tissues in mouse and zebrafish.**

639 (A-B) Representative IF of trachea sections in *Kif6*<sup>p.G555fs/+</sup> and *Kif6*<sup>p.G555fs/p.G555fs</sup> mice showing  
640 no cilia defects present in trachea of *Kif6* mutant mice. Acetylated tubulin (green) marking cilia,  
641 DAPI-stained nuclei (magenta) (C-D) Representative IF of zebrafish nasal pit cilia shows typical  
642 cilia in *kif6* mutant zebrafish to wildtype counterparts. Acetylated tubulin (magenta) marking  
643 cilia, gamma-tubulin marking basal bodies (green). Scale bars are 20μM.

644

645 **S7 Fig X-rays of *Kif6*<sup>p.G555fs/p.G555fs</sup> mutant mice.** Representative X-rays of wildtype and  
646 *Kif6*<sup>p.G555fs/p.G555fs</sup> mutant mice shows no scoliosis at P28. *Kif6*<sup>p.G555fs/p.G555fs</sup> mice do however  
647 display skull expansion caused by progressive hydrocephalus (Animal #1 and #2).

648

649 **Table SI - Eighty-three homozygous variants from WES**

650

651 **Table SII - Sixty-three homozygous regions from homozygosity mapping**

652

653 **Table SIII - Mouse specific oligos and primers**

654

655 **Movie 1- Representative WT\_Danio\_Iodine-contrasted microCT transverse**

656

657 **Movie 2- Representative *kif6*<sup>sko/sko</sup>\_Danio\_Iodine-contrasted microCT**  
658 **transverse**

## 659 References

- 660 1. Whedon JM, Glassey D. Cerebrospinal fluid stasis and its clinical significance. *Altern*  
661 *Ther Health Med.* 2009;15(3):54-60. PubMed PMID: 19472865; PubMed Central PMCID:  
662 PMCPMC2842089.
- 663 2. Rubenstein E. Relationship of senescence of cerebrospinal fluid circulatory system to  
664 dementias of the aged. *Lancet.* 1998;351(9098):283-5. doi: 10.1016/S0140-6736(97)09234-9.  
665 PubMed PMID: 9457114.
- 666 3. Jacquet BV, Salinas-Mondragon R, Liang H, Therit B, Buie JD, Dykstra M, et al. FoxJ1-  
667 dependent gene expression is required for differentiation of radial glia into ependymal cells and a  
668 subset of astrocytes in the postnatal brain. *Development.* 2009;136(23):4021-31. doi:  
669 10.1242/dev.041129. PubMed PMID: 19906869; PubMed Central PMCID: PMCPMC3118431.
- 670 4. Spassky N, Meunier A. The development and functions of multiciliated epithelia. *Nat*  
671 *Rev Mol Cell Biol.* 2017;18(7):423-36. Epub 2017/04/13. doi: 10.1038/nrm.2017.21. PubMed  
672 PMID: 28400610.
- 673 5. Gray RS, Roszko I, Solnica-Krezel L. Planar cell polarity: coordinating morphogenetic  
674 cell behaviors with embryonic polarity. *Dev Cell.* 2011;21(1):120-33. doi:  
675 10.1016/j.devcel.2011.06.011. PubMed PMID: 21763613; PubMed Central PMCID:  
676 PMCPMC3166557.
- 677 6. Ohata S, Nakatani J, Herranz-Perez V, Cheng J, Belinson H, Inubushi T, et al. Loss of  
678 Dishevelleds disrupts planar polarity in ependymal motile cilia and results in hydrocephalus.  
679 *Neuron.* 2014;83(3):558-71. doi: 10.1016/j.neuron.2014.06.022. PubMed PMID: 25043421;  
680 PubMed Central PMCID: PMCPMC4126882.
- 681 7. Banizs B, Pike MM, Millican CL, Ferguson WB, Komlosi P, Sheetz J, et al.  
682 Dysfunctional cilia lead to altered ependyma and choroid plexus function, and result in the  
683 formation of hydrocephalus. *Development.* 2005;132(23):5329-39. doi: 10.1242/dev.02153.  
684 PubMed PMID: 16284123.
- 685 8. Lee L. Riding the wave of ependymal cilia: genetic susceptibility to hydrocephalus in  
686 primary ciliary dyskinesia. *J Neurosci Res.* 2013;91(9):1117-32. doi: 10.1002/jnr.23238.  
687 PubMed PMID: 23686703.
- 688 9. Petrik D, Myoga MH, Grade S, Gerkau NJ, Pusch M, Rose CR, et al. Epithelial Sodium  
689 Channel Regulates Adult Neural Stem Cell Proliferation in a Flow-Dependent Manner. *Cell*  
690 *Stem Cell.* 2018;22(6):865-78 e8. Epub 2018/05/22. doi: 10.1016/j.stem.2018.04.016. PubMed  
691 PMID: 29779889.
- 692 10. Kousi M, Katsanis N. The Genetic Basis of Hydrocephalus. *Annu Rev Neurosci.*  
693 2016;39:409-35. doi: 10.1146/annurev-neuro-070815-014023. PubMed PMID: 27145913.
- 694 11. Reiter JF, Leroux MR. Genes and molecular pathways underpinning ciliopathies. *Nat*  
695 *Rev Mol Cell Biol.* 2017;18(9):533-47. Epub 2017/07/13. doi: 10.1038/nrm.2017.60. PubMed  
696 PMID: 28698599; PubMed Central PMCID: PMCPMC5851292.
- 697 12. Verhey KJ, Kaul N, Soppina V. Kinesin assembly and movement in cells. *Annu Rev*  
698 *Biophys.* 2011;40:267-88. doi: 10.1146/annurev-biophys-042910-155310. PubMed PMID:  
699 21332353.
- 700 13. Hirokawa N, Noda Y, Tanaka Y, Niwa S. Kinesin superfamily motor proteins and  
701 intracellular transport. *Nat Rev Mol Cell Biol.* 2009;10(10):682-96. doi: 10.1038/nrm2774.  
702 PubMed PMID: 19773780.

- 703 14. Lechtreck KF. IFT-Cargo Interactions and Protein Transport in Cilia. *Trends Biochem*  
704 *Sci.* 2015;40(12):765-78. Epub 2015/10/27. doi: 10.1016/j.tibs.2015.09.003. PubMed PMID:  
705 26498262; PubMed Central PMCID: PMC4661101.
- 706 15. Demonchy R, Blisnick T, Deprez C, Toutirais G, Loussert C, Marande W, et al. Kinesin  
707 9 family members perform separate functions in the trypanosome flagellum. *J Cell Biol.*  
708 2009;187(5):615-22. Epub 2009/12/02. doi: 10.1083/jcb.200903139. PubMed PMID: 19948486;  
709 PubMed Central PMCID: PMC2806587.
- 710 16. Niwa S, Nakajima K, Miki H, Minato Y, Wang D, Hirokawa N. KIF19A is a  
711 microtubule-depolymerizing kinesin for ciliary length control. *Dev Cell.* 2012;23(6):1167-75.  
712 Epub 2012/11/22. doi: 10.1016/j.devcel.2012.10.016. PubMed PMID: 23168168.
- 713 17. Li Y, Iakoubova OA, Shiffman D, Devlin JJ, Forrester JS, Superko HR. KIF6  
714 polymorphism as a predictor of risk of coronary events and of clinical event reduction by statin  
715 therapy. *Am J Cardiol.* 2010;106(7):994-8. Epub 2010/09/22. doi:  
716 10.1016/j.amjcard.2010.05.033. PubMed PMID: 20854963.
- 717 18. Assimes TL, Holm H, Kathiresan S, Reilly MP, Thorleifsson G, Voight BF, et al. Lack of  
718 association between the Trp719Arg polymorphism in kinesin-like protein-6 and coronary artery  
719 disease in 19 case-control studies. *J Am Coll Cardiol.* 2010;56(19):1552-63. Epub 2010/10/12.  
720 doi: 10.1016/j.jacc.2010.06.022. PubMed PMID: 20933357; PubMed Central PMCID:  
721 PMC3084526.
- 722 19. Buchan JG, Gray RS, Gansner JM, Alvarado DM, Burgert L, Gitlin JD, et al. Kinesin  
723 family member 6 (kif6) is necessary for spine development in zebrafish. *Dev Dyn.*  
724 2014;243(12):1646-57. doi: 10.1002/dvdy.24208. PubMed PMID: 25283277.
- 725 20. Schultz J, Milpetz F, Bork P, Ponting CP. SMART, a simple modular architecture  
726 research tool: identification of signaling domains. *Proc Natl Acad Sci U S A.* 1998;95(11):5857-  
727 64. Epub 1998/05/30. PubMed PMID: 9600884; PubMed Central PMCID: PMC34487.
- 728 21. Schwenk F, Baron U, Rajewsky K. A cre-transgenic mouse strain for the ubiquitous  
729 deletion of loxP-flanked gene segments including deletion in germ cells. *Nucleic Acids Res.*  
730 1995;23(24):5080-1. Epub 1995/12/25. PubMed PMID: 8559668; PubMed Central PMCID:  
731 PMC307516.
- 732 22. Spassky N, Merkle FT, Flames N, Tramontin AD, Garcia-Verdugo JM, Alvarez-Buylla  
733 A. Adult ependymal cells are postmitotic and are derived from radial glial cells during  
734 embryogenesis. *J Neurosci.* 2005;25(1):10-8. doi: 10.1523/JNEUROSCI.1108-04.2005. PubMed  
735 PMID: 15634762.
- 736 23. Pfenninger CV, Roschupkina T, Hertwig F, Kottwitz D, Englund E, Bengzon J, et al.  
737 CD133 is not present on neurogenic astrocytes in the adult subventricular zone, but on  
738 embryonic neural stem cells, ependymal cells, and glioblastoma cells. *Cancer Res.*  
739 2007;67(12):5727-36. Epub 2007/06/19. doi: 10.1158/0008-5472.CAN-07-0183. PubMed  
740 PMID: 17575139.
- 741 24. Grimes DT, Boswell CW, Morante NF, Henkelman RM, Burdine RD, Ciruna B.  
742 Zebrafish models of idiopathic scoliosis link cerebrospinal fluid flow defects to spine curvature.  
743 *Science.* 2016;352(6291):1341-4. doi: 10.1126/science.aaf6419. PubMed PMID: 27284198.
- 744 25. Metscher BD. MicroCT for developmental biology: a versatile tool for high-contrast 3D  
745 imaging at histological resolutions. *Dev Dyn.* 2009;238(3):632-40. doi: 10.1002/dvdy.21857.  
746 PubMed PMID: 19235724.
- 747 26. Wullmann MF, Rupp B, Reichert H. Neuroanatomy of the zebrafish brain : a topological  
748 atlas. Basel ; Boston: Birkhäuser Verlag; 1996. vi, 144 p. p.



- 749 27. Kee HL, Dishinger JF, Blasius TL, Liu CJ, Margolis B, Verhey KJ. A size-exclusion  
750 permeability barrier and nucleoporins characterize a ciliary pore complex that regulates transport  
751 into cilia. *Nat Cell Biol.* 2012;14(4):431-7. doi: 10.1038/ncb2450. PubMed PMID: 22388888;  
752 PubMed Central PMCID: PMCPMC3319646.
- 753 28. Hameed A, Bennett E, Ciani B, Hoebbers LP, Milner R, Lawrie A, et al. No evidence for  
754 cardiac dysfunction in Kif6 mutant mice. *PLoS One.* 2013;8(1):e54636. doi:  
755 10.1371/journal.pone.0054636. PubMed PMID: 23355886; PubMed Central PMCID:  
756 PMCPMC3552957.
- 757 29. Liu Z, Gray RS. Animal models of idiopathic scoliosis. In: Kusumi K, Dunwoodie SL,  
758 editors. *The Genetics and Development of Scoliosis.* New York, NY: Springer Nature: Cham,  
759 Switzerland. ; 2018.
- 760 30. Karner CM, Long F, Solnica-Krezel L, Monk KR, Gray RS. Gpr126/Adgrg6 deletion in  
761 cartilage models idiopathic scoliosis and pectus excavatum in mice. *Hum Mol Genet.*  
762 2015;24(15):4365-73. doi: 10.1093/hmg/ddv170. PubMed PMID: 25954032; PubMed Central  
763 PMCID: PMCPMC4492399.
- 764 31. Schick RW, Matson DD. What is arrested hydrocephalus? *J Pediatr.* 1961;58:791-9.  
765 Epub 1961/06/01. PubMed PMID: 13747587.
- 766 32. Brinker T, Stopa E, Morrison J, Klinge P. A new look at cerebrospinal fluid circulation.  
767 *Fluids Barriers CNS.* 2014;11:10. Epub 2014/05/13. doi: 10.1186/2045-8118-11-10. PubMed  
768 PMID: 24817998; PubMed Central PMCID: PMCPMC4016637.
- 769 33. de Ligt J, Willemsen MH, van Bon BW, Kleefstra T, Yntema HG, Kroes T, et al.  
770 Diagnostic exome sequencing in persons with severe intellectual disability. *N Engl J Med.*  
771 2012;367(20):1921-9. Epub 2012/10/05. doi: 10.1056/NEJMoa1206524. PubMed PMID:  
772 23033978.
- 773 34. Najmabadi H, Hu H, Garshasbi M, Zemojtel T, Abedini SS, Chen W, et al. Deep  
774 sequencing reveals 50 novel genes for recessive cognitive disorders. *Nature.* 2011;478(7367):57-  
775 63. Epub 2011/09/23. doi: 10.1038/nature10423. PubMed PMID: 21937992.
- 776 35. Poirier K, Lebrun N, Broix L, Tian G, Saillour Y, Boscheron C, et al. Mutations in  
777 TUBG1, DYNC1H1, KIF5C and KIF2A cause malformations of cortical development and  
778 microcephaly. *Nat Genet.* 2013;45(6):639-47. Epub 2013/04/23. doi: 10.1038/ng.2613. PubMed  
779 PMID: 23603762; PubMed Central PMCID: PMCPMC3826256.
- 780 36. Willemsen MH, Ba W, Wissink-Lindhout WM, de Brouwer AP, Haas SA, Bienek M, et  
781 al. Involvement of the kinesin family members KIF4A and KIF5C in intellectual disability and  
782 synaptic function. *J Med Genet.* 2014;51(7):487-94. Epub 2014/05/09. doi: 10.1136/jmedgenet-  
783 2013-102182. PubMed PMID: 24812067.
- 784 37. Labun K, Montague TG, Gagnon JA, Thyme SB, Valen E. CHOPCHOP v2: a web tool  
785 for the next generation of CRISPR genome engineering. *Nucleic Acids Res.*  
786 2016;44(W1):W272-6. doi: 10.1093/nar/gkw398. PubMed PMID: 27185894; PubMed Central  
787 PMCID: PMCPMC4987937.
- 788 38. Gagnon JA, Valen E, Thyme SB, Huang P, Ahkmetova L, Pauli A, et al. Efficient  
789 mutagenesis by Cas9 protein-mediated oligonucleotide insertion and large-scale assessment of  
790 single-guide RNAs. *PLoS One.* 2014;9(5):e98186. doi: 10.1371/journal.pone.0098186. PubMed  
791 PMID: 24873830; PubMed Central PMCID: PMC4038517.
- 792 39. Skarnes WC, Rosen B, West AP, Koutsourakis M, Bushell W, Iyer V, et al. A conditional  
793 knockout resource for the genome-wide study of mouse gene function. *Nature.*

794 2011;474(7351):337-42. doi: 10.1038/nature10163. PubMed PMID: 21677750; PubMed Central  
795 PMCID: PMCPMC3572410.  
796 40. Gray RS, Wilm TP, Smith J, Bagnat M, Dale RM, Topczewski J, et al. Loss of col8a1a  
797 function during zebrafish embryogenesis results in congenital vertebral malformations. *Dev Biol.*  
798 2014;386(1):72-85. doi: 10.1016/j.ydbio.2013.11.028. PubMed PMID: 24333517; PubMed  
799 Central PMCID: PMC3938106.  
800 41. Kawakami K. Tol2: a versatile gene transfer vector in vertebrates. *Genome Biol.* 2007;8  
801 Suppl 1:S7. doi: 10.1186/gb-2007-8-s1-s7. PubMed PMID: 18047699; PubMed Central PMCID:  
802 PMCPMC2106836.  
803 42. Schindelin J, Arganda-Carreras I, Frise E, Kaynig V, Longair M, Pietzsch T, et al. Fiji: an  
804 open-source platform for biological-image analysis. *Nat Methods.* 2012;9(7):676-82. doi:  
805 10.1038/nmeth.2019. PubMed PMID: 22743772; PubMed Central PMCID: PMCPMC3855844.  
806



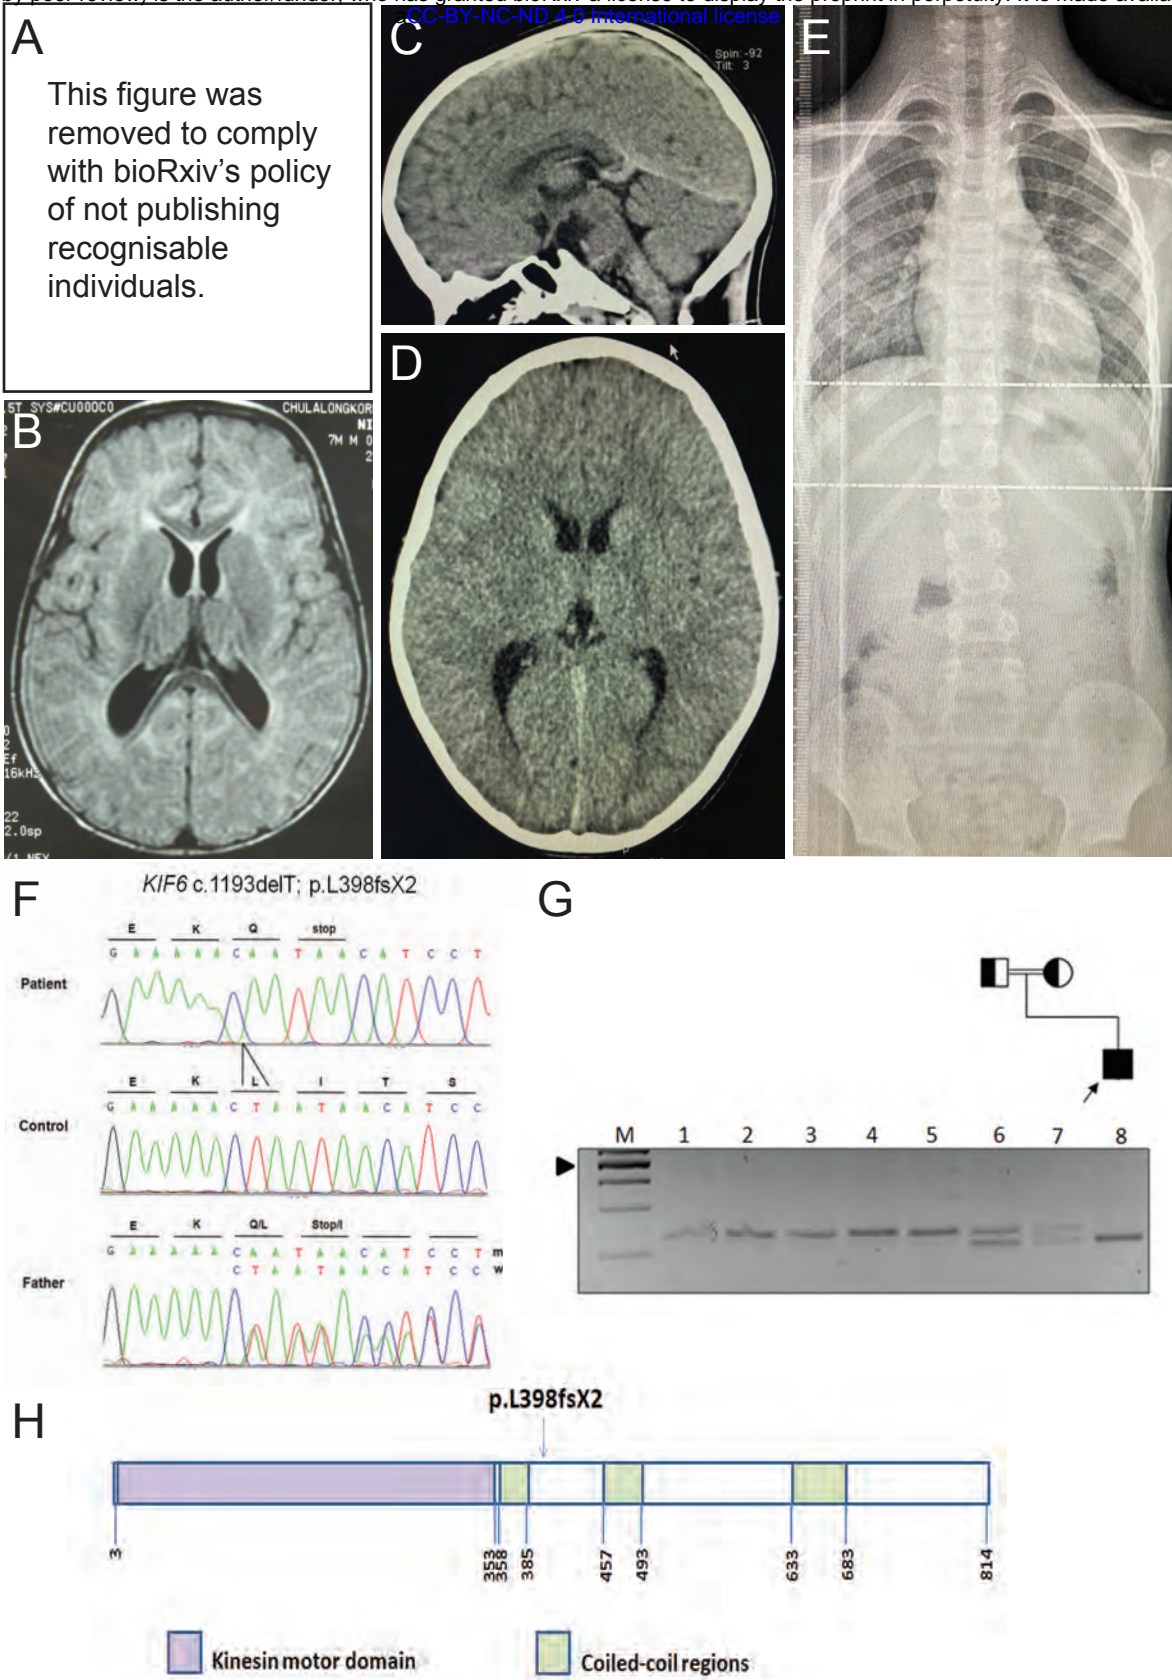

Figure 1  
Konjukusic et al.,

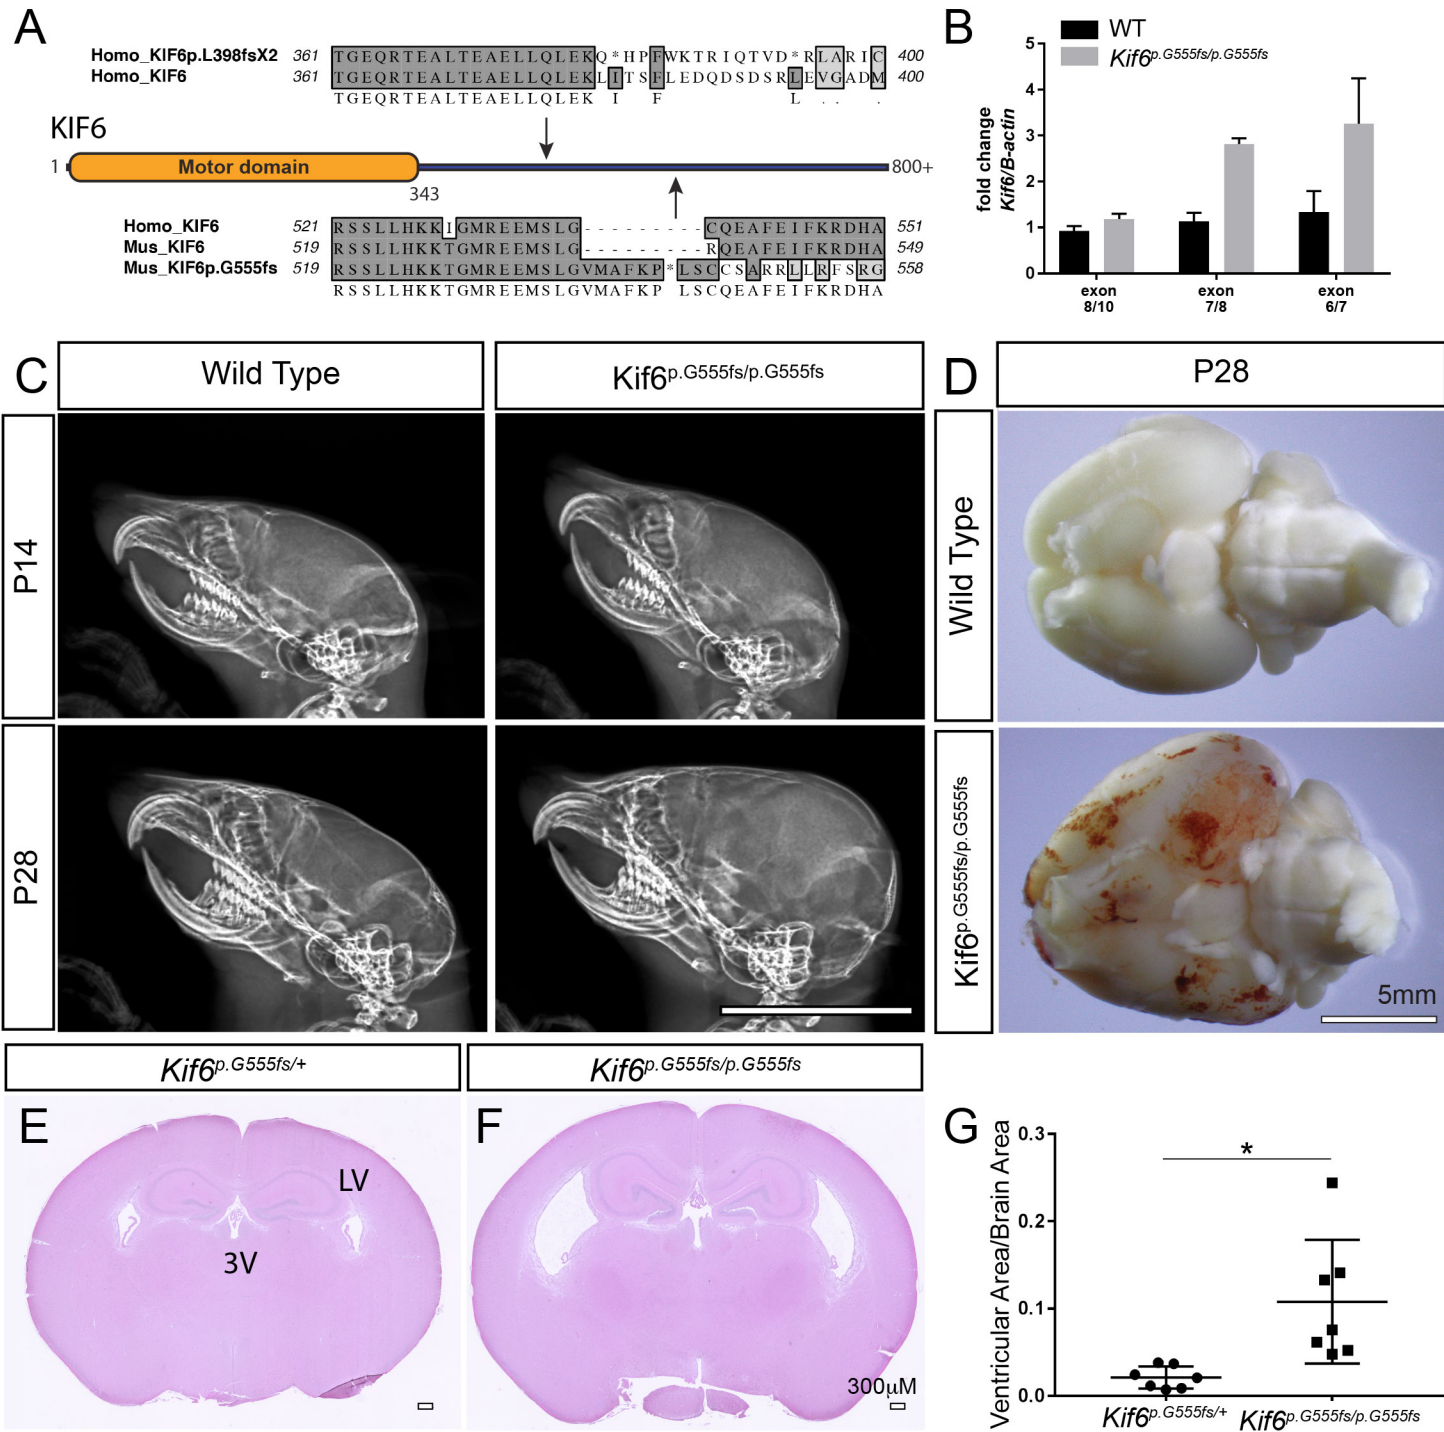

Figure 2  
Konjikusic et al.,



Ventricle

Oviduct

Trachea

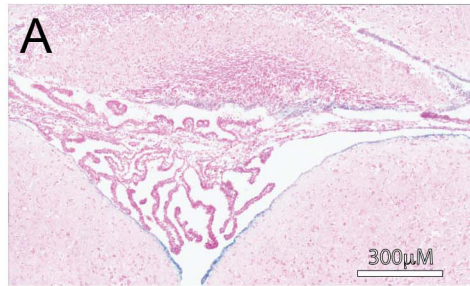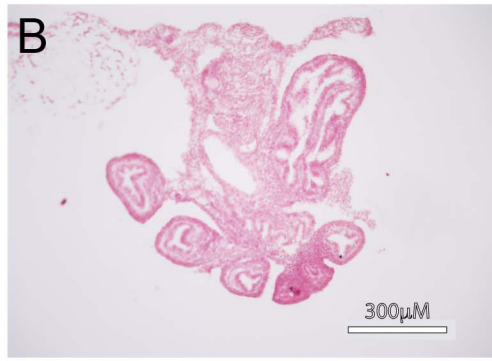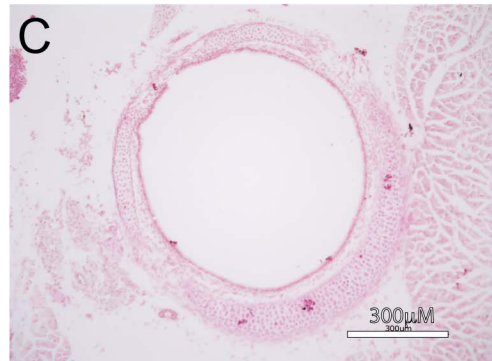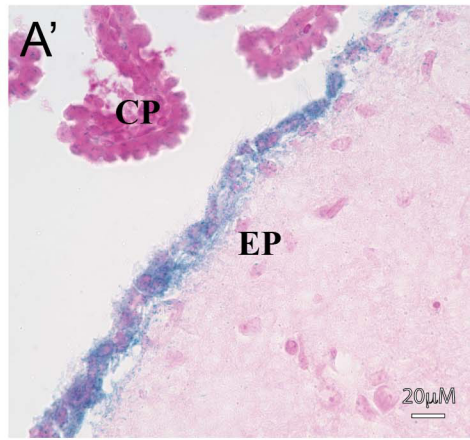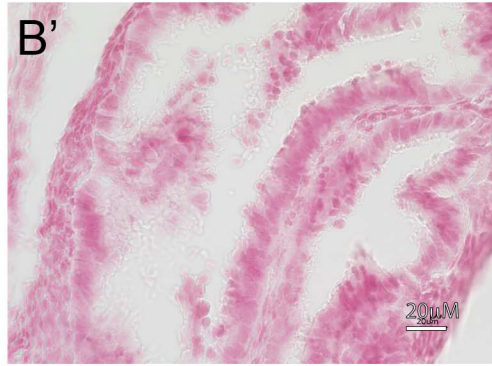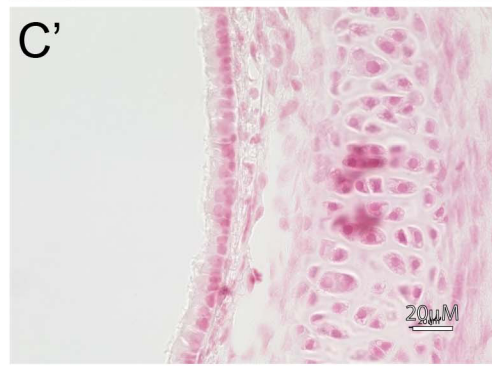

Figure 3  
Konjikusic et al.,

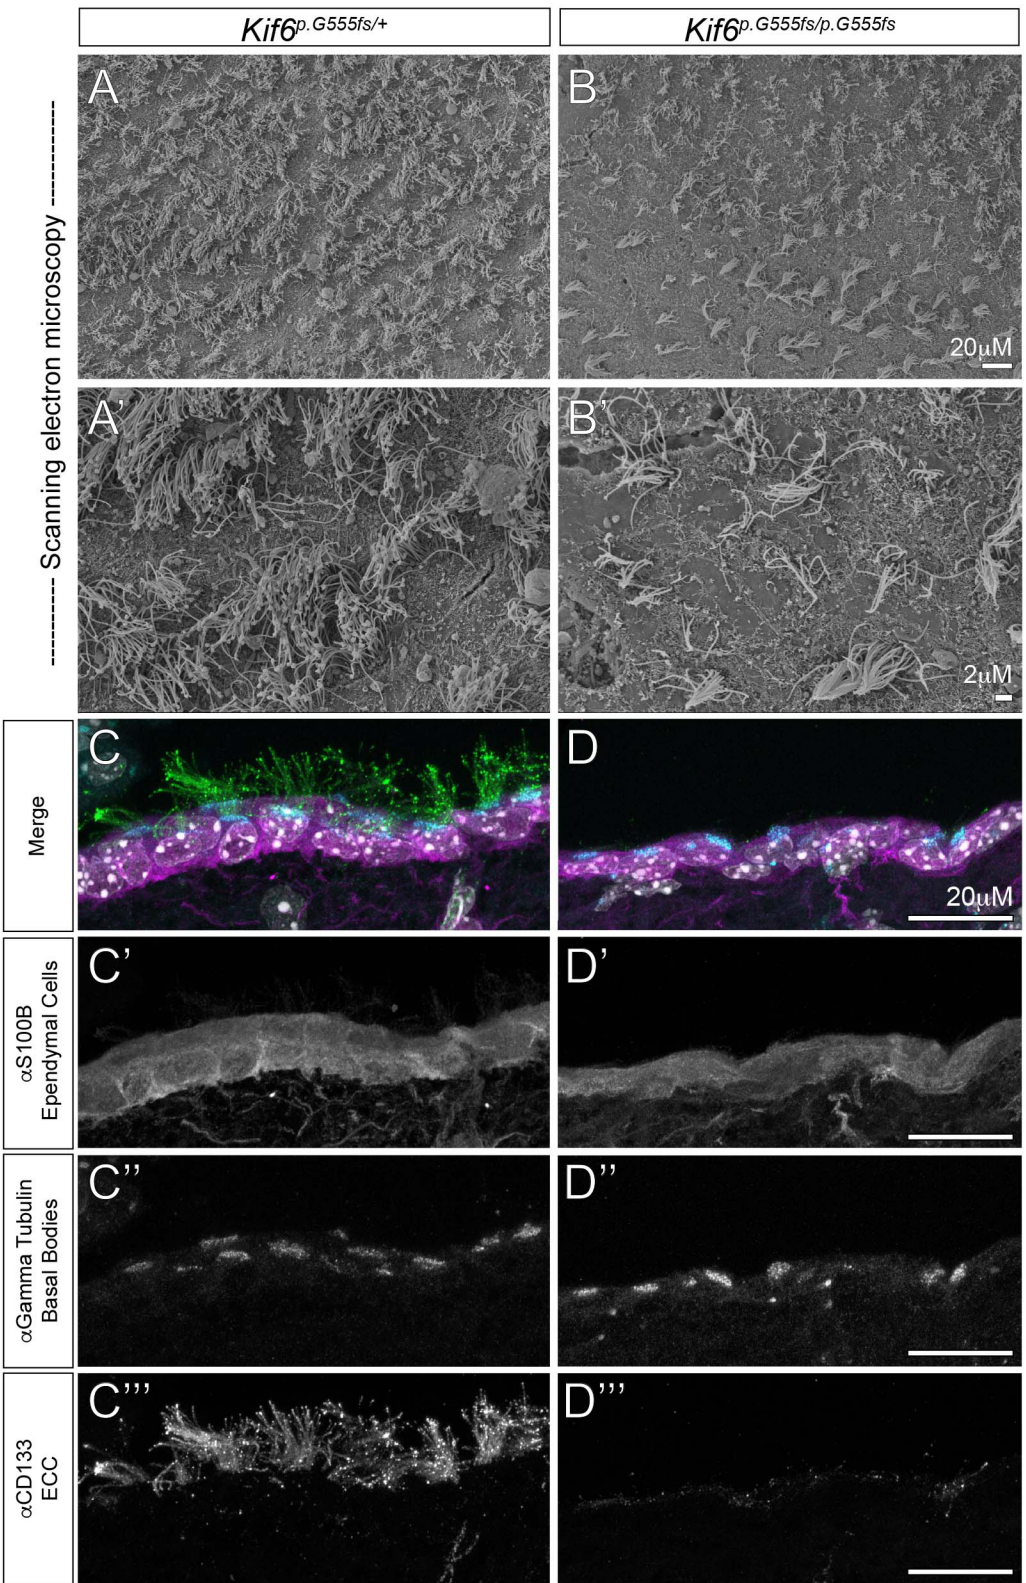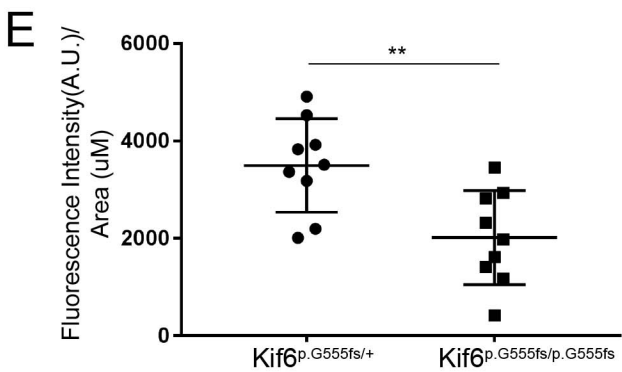

Figure 4  
Konjikusic et al.,



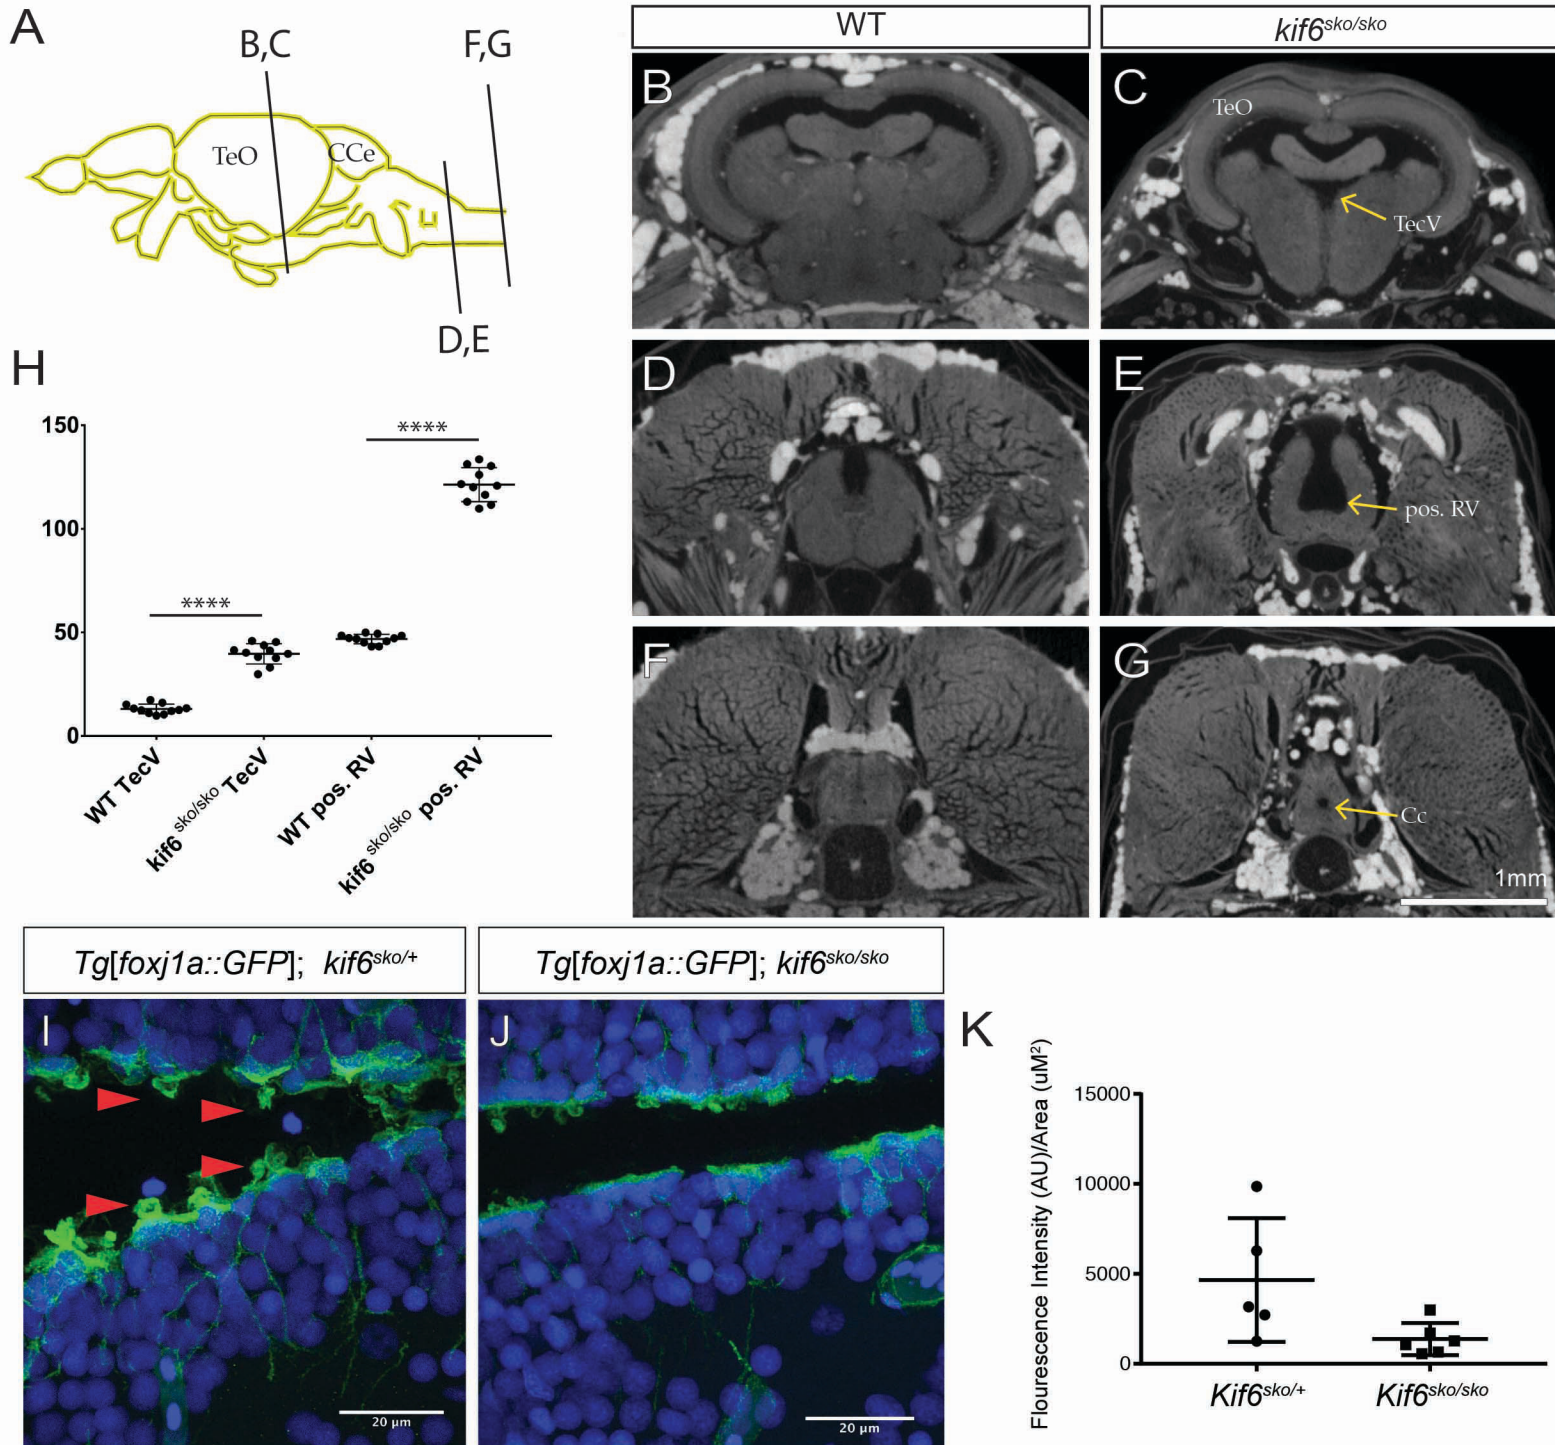

Figure 5  
Konjikusic et al.,

|    |                                                     |
|----|-----------------------------------------------------|
| Hs | YPELREALVSVWLQCTAISRIYTVGRS-FEGRELLVIELSDNPGVHEPGE  |
| Pt | YPELREALVSVWLQCTAISRIYTVGRS-FEGRELLVIELSDNPGVHEPGE  |
| Mc | YPELREALVSVWLQCTAISRIYTVGRS-FEGRELLVIELSDNPGVHEPGE  |
| Mm | YPELREALVSVWLQCTAISRIYTVGRS-FEGRELLVIELSDNPGVHEPGE  |
| Rn | YPELREALVSVWLQCTAISRIYTVGRS-FEGRELLVIELSDNPGVHEPGE  |
| Bt | YPELREALVSVWLQCAAVSRIYTVGRS-FEGRELLVLELSDNPGVHEPGE  |
| Cl | -----                                               |
| Oc | GKSAVHSTATEWFLPGCS---MERP-VLG---CCPLMPKSLALFQEGE    |
| Gg | YAELREALVAVWLQCPAISRIYTVGRS-SEGRELLVIEVSDRPGHEPGE   |
| Dr | YEEMRKSLVSVWLQCPISITRIYTVGES-FEGRELLVLEMSDNPGIHEPGE |
| Tn | YEELRKALVSVWLQCPTITRIYTIGES-FEGRELLVLEMSDNPGTHEPGE  |
| Xt | YPEMRDALVAVWLQCPISISRIYTVGRS-FEGRELLVIEISDNPGHEPGE  |
| Tc | NDELVQVLQDVNSRCPNITRVYTLTETSVLGLPLYLIEFSTKPGHHEIMK  |
| Ce | QAQLEAKLGEINEKCPFITTLYEIGQS-VEGRPLVVIQFSTTPGEHIPTK  |
| Sk | HEELKKVLDDTAAKCPDITRIYSPGQS-VEKRELWTIEISDKPGQHELGE  |

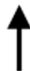

*CPE* (p.V79M)

A

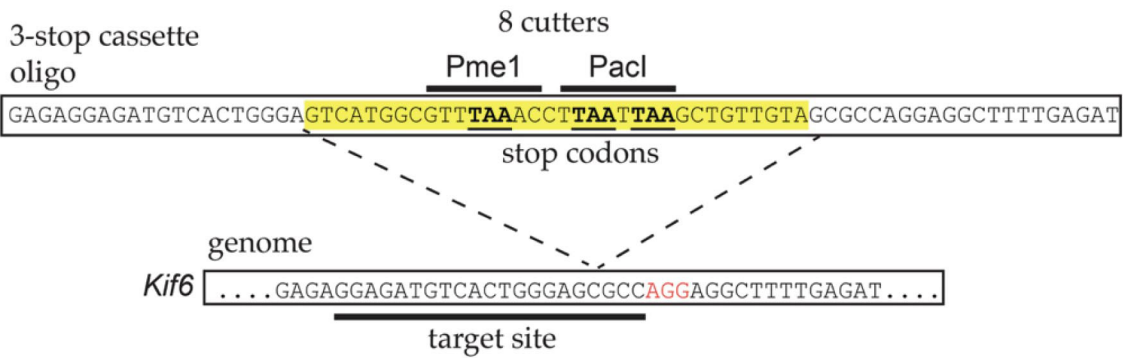

B

*Kif6* ex14 F/R- Pme1 digest

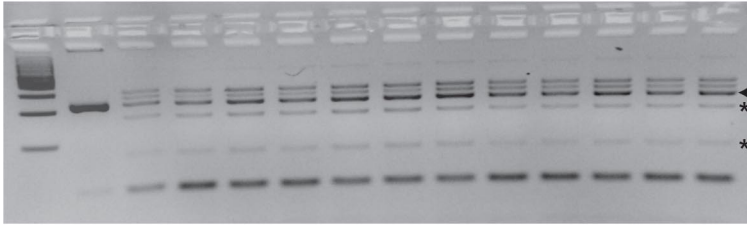

C

Donor specific PCR- Donor F/*Kif6* ex14R

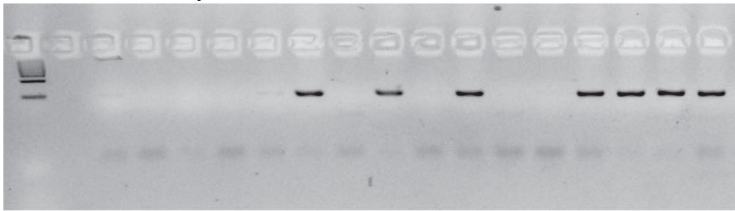

D

CRISPR + donor injection F0 n (%)

|                                     |           |
|-------------------------------------|-----------|
| Total F0 mice weaned                | 64 (100)  |
| Total genotyped with mutations      | 54 (84.4) |
| Total w/ integration of donor oligo | 14 (22)   |
| Total w/ hydrocephalus              | 5 (8)     |

E

F1 outcrosses with positive integration of donor oligo

| Mouse           | ratio litter1 (%): ratio litter 2 (%) | Total pups in litter 1, litter 2 | Total transmission % |
|-----------------|---------------------------------------|----------------------------------|----------------------|
| Female 1 (MK53) | 0 (0) : 0 (0)                         | 4, 9                             | 0                    |
| Female 2 (MK63) | 5 (62.5) : 3 (50)                     | 8, 6                             | 57.1                 |
| Female 3 (MK61) | 1 (11) : 5 (50)                       | 9, 10                            | 31.6                 |
| Male 1 (MK68)   | 2 (50) : 0 (0)                        | 4, 4                             | 25                   |
| Male 2 (MK86)   | 4 (57) : 4 (44)                       | 7, 4                             | 72.7                 |



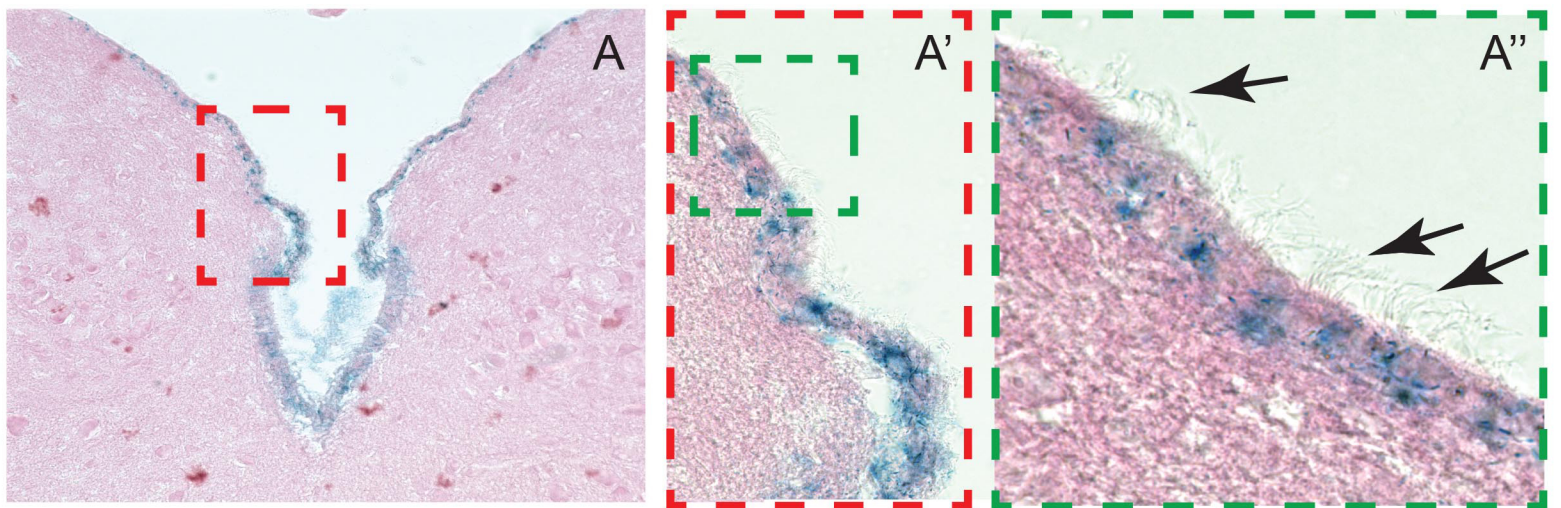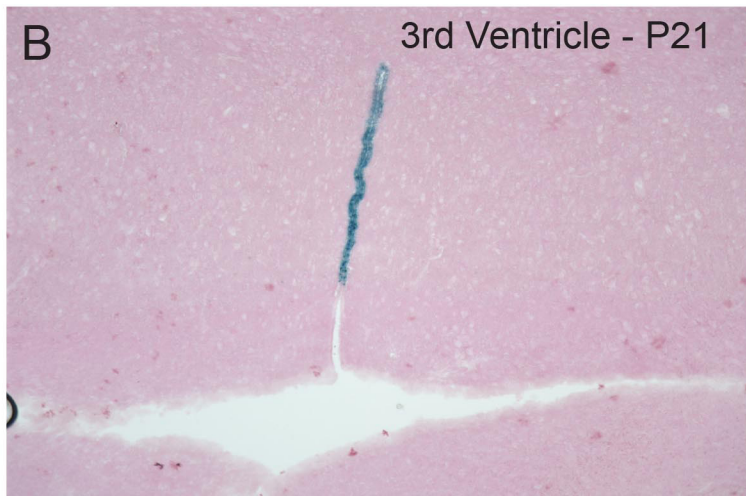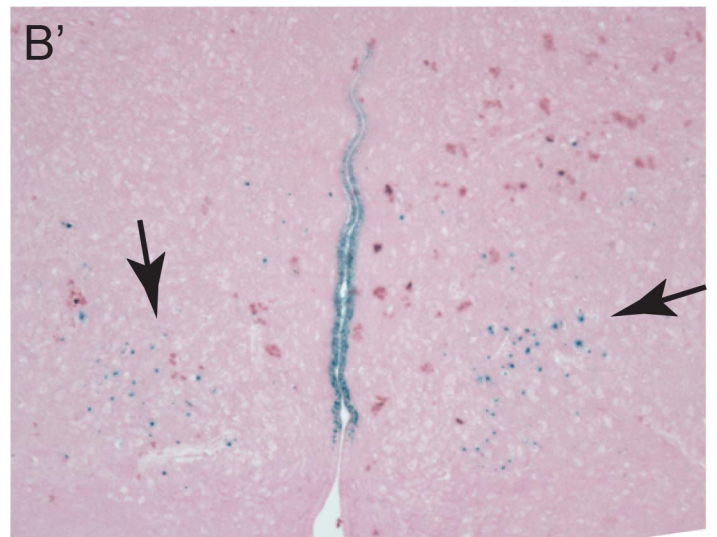

4<sup>th</sup> Ventricle - P10

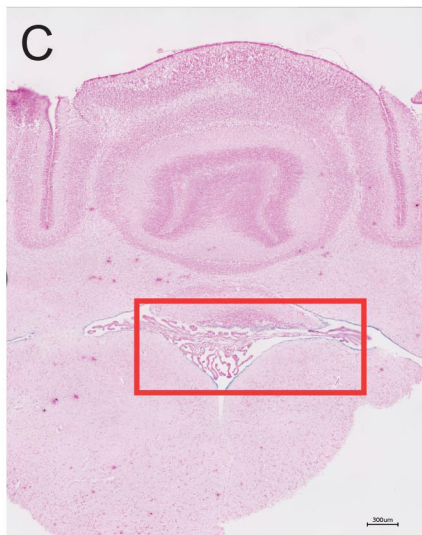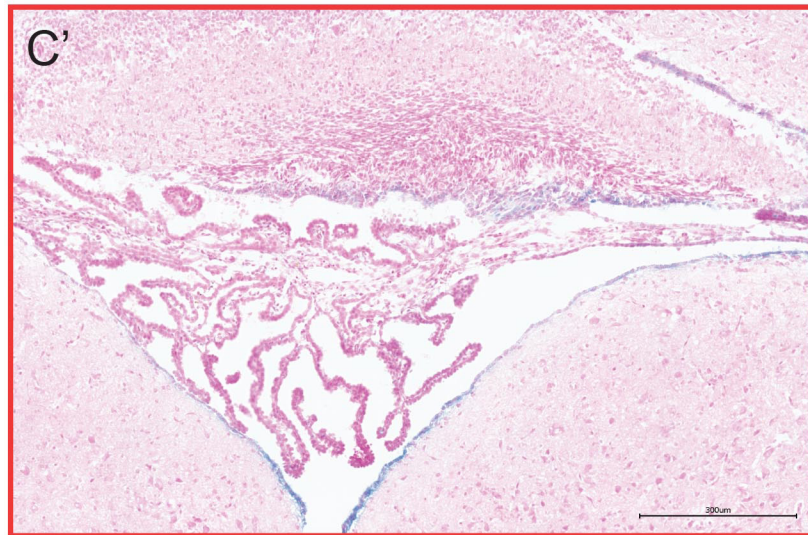



Control

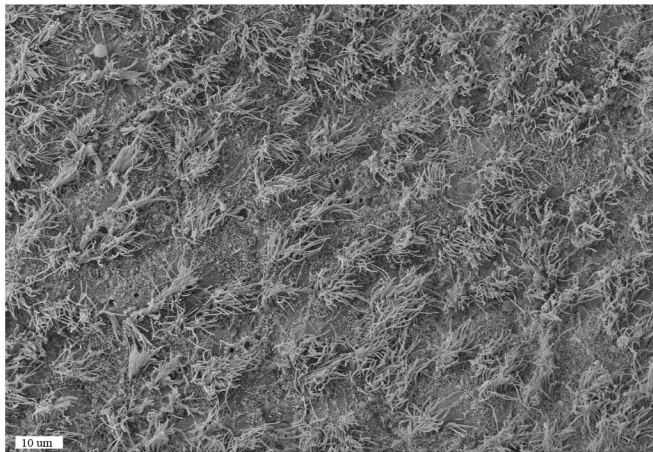

Kif6<sup>p.G555fs/p.G555fs</sup>

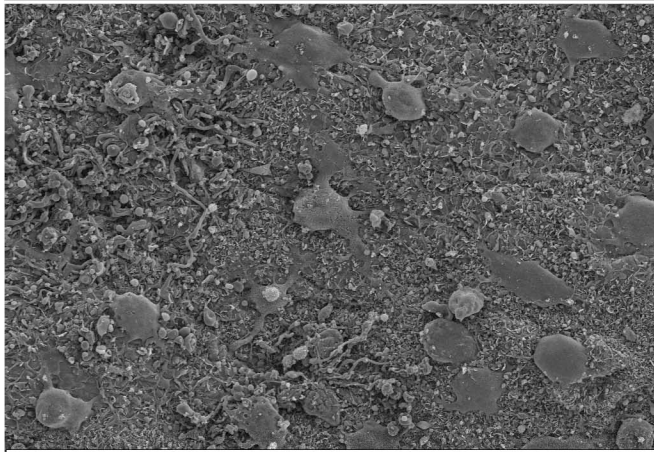

Supp. Fig. SF4  
Konjikusic et al.,

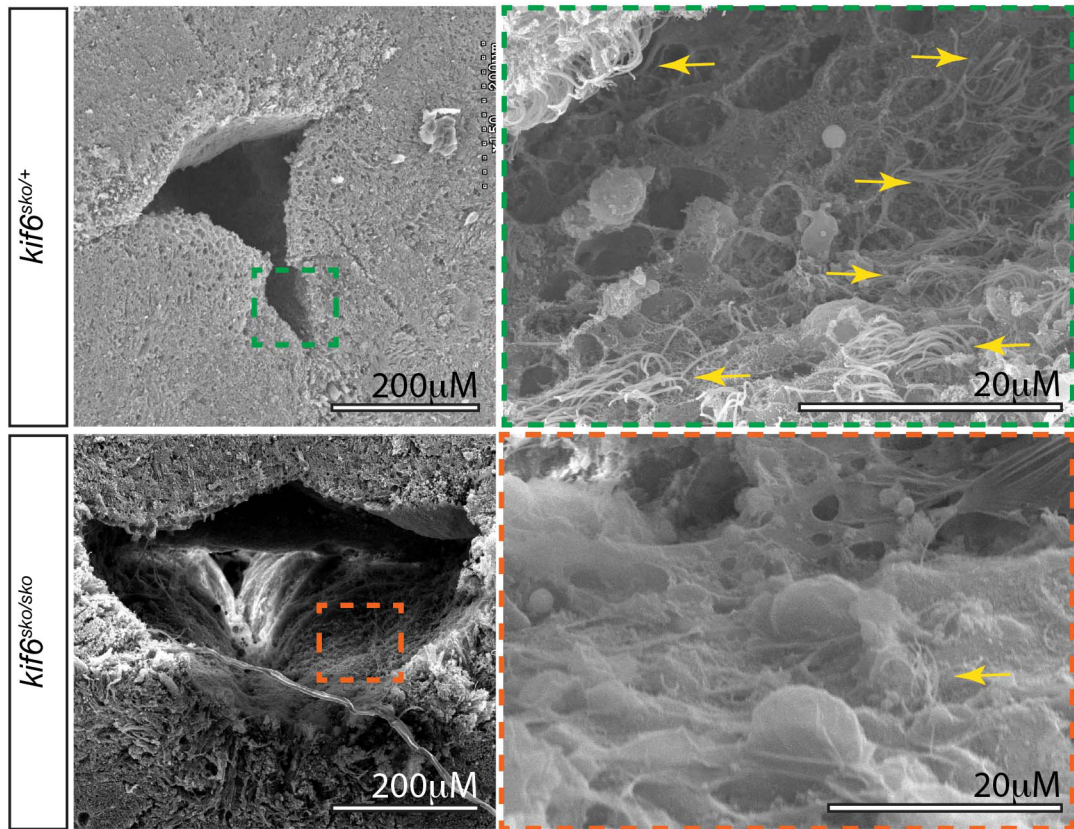

Supp. Fig. SF5  
Konjikusic et al.,

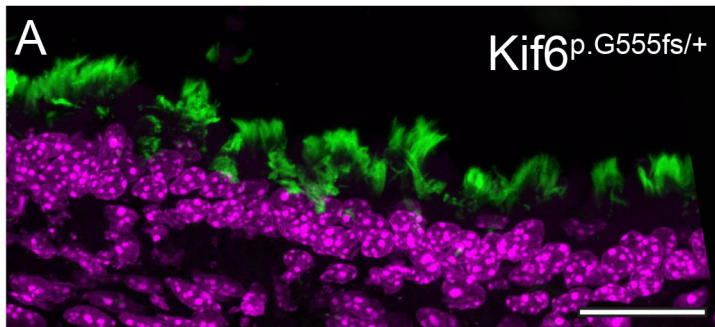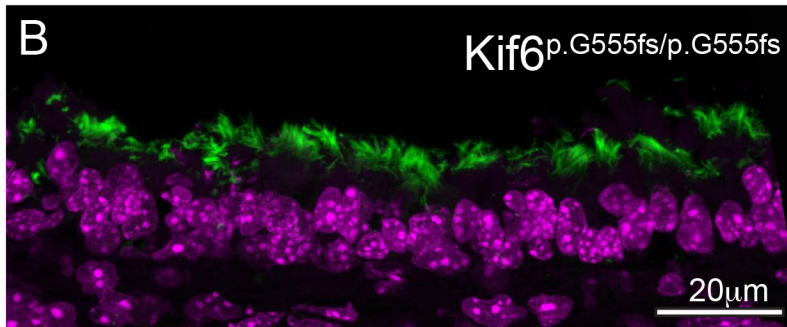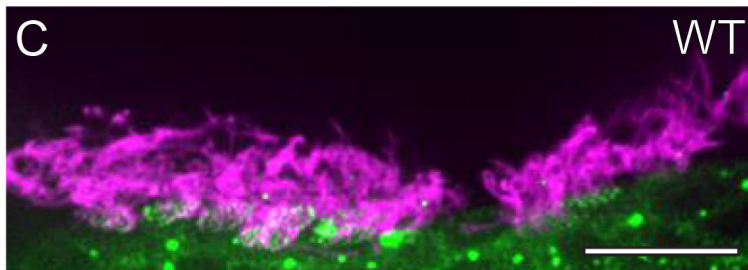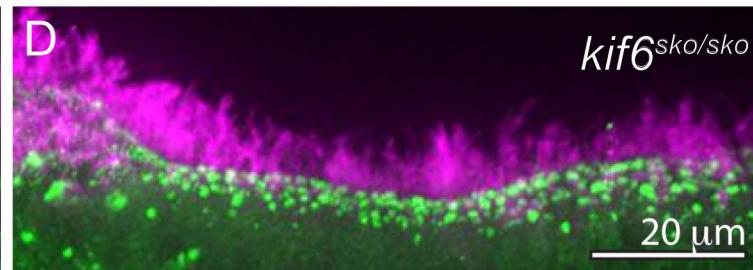

----- WT -----

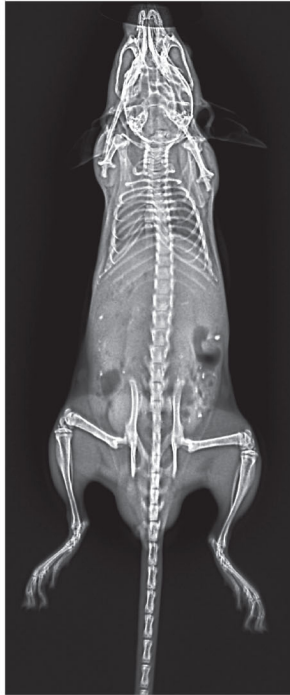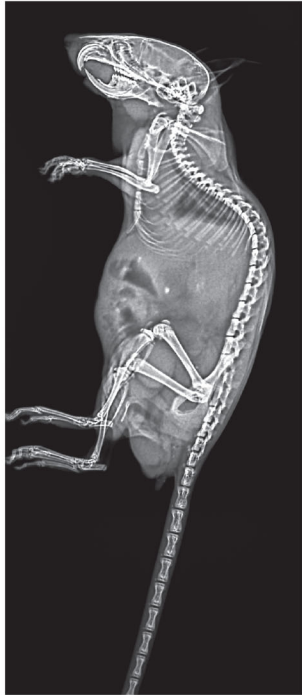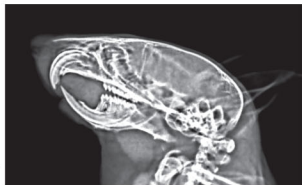

----- Animal #1 -----

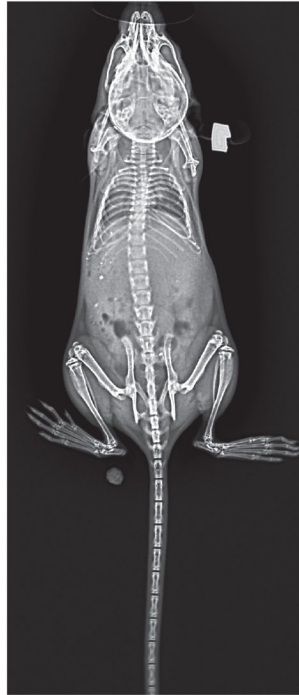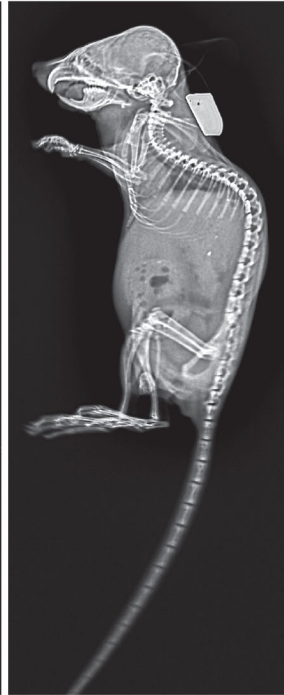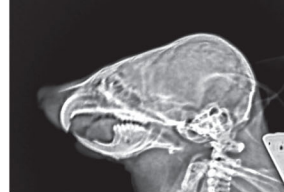

--- Animal #2 ---

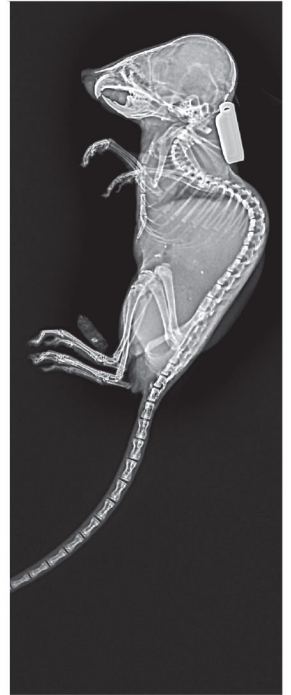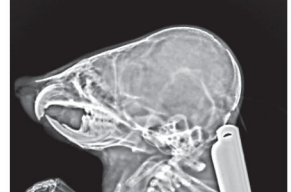

**Supplementary Table SI. Eighty three homozygous variants from WES**

| Chromosome | Position_start | Position_end | Gene           | Change                  |
|------------|----------------|--------------|----------------|-------------------------|
| 1          | 26608891       | 26608896     | <i>UBXN11</i>  | nonframeshift_deletion  |
| 1          | 54605319       | 54605319     | <i>CDCP2</i>   | frameshift_insertion    |
| 1          | 152681694      | 152681694    | <i>LCE4A</i>   | nonframeshift_insertion |
| 1          | 156565050      | 156565050    | <i>GPATCH4</i> | frameshift_insertion    |
| 1          | 160650923      | 160650923    | <i>CD48</i>    | frameshift_deletion     |
| 2          | 96148317       | 96148317     | <i>TRIM43B</i> | nonsynonymous_SNV       |
| 2          | 130902532      | 130902532    | <i>CCDC74B</i> | nonsynonymous_SNV       |
| 2          | 240981597      | 240981597    | <i>PRR21</i>   | nonsynonymous_SNV       |
| 2          | 240981627      | 240981627    | <i>PRR21</i>   | nonsynonymous_SNV       |
| 2          | 240981655      | 240981655    | <i>PRR21</i>   | nonsynonymous_SNV       |
| 2          | 241621800      | 241621800    | <i>AQP12B</i>  | frameshift_deletion     |
| 3          | 40503552       | 40503552     | <i>RPL14</i>   | nonframeshift_insertion |
| 3          | 53324829       | 53324834     | <i>DCPIA</i>   | nonframeshift_deletion  |
| 3          | 56650056       | 56650056     | <i>CCDC66</i>  | nonframeshift_insertion |
| 3          | 75786586       | 75786586     | <i>ZNF717</i>  | nonsynonymous_SNV       |
| 3          | 75786662       | 75786662     | <i>ZNF717</i>  | nonsynonymous_SNV       |
| 3          | 75786672       | 75786672     | <i>ZNF717</i>  | nonsynonymous_SNV       |
| 3          | 75786684       | 75786684     | <i>ZNF717</i>  | nonsynonymous_SNV       |
| 3          | 75786764       | 75786764     | <i>ZNF717</i>  | frameshift_deletion     |
| 3          | 75790810       | 75790810     | <i>ZNF717</i>  | frameshift_insertion    |



|   |           |           |                |                        |
|---|-----------|-----------|----------------|------------------------|
| 3 | 195505930 | 195505930 | <i>MUC4</i>    | nonsynonymous_SNV      |
| 3 | 195506099 | 195506099 | <i>MUC4</i>    | nonsynonymous_SNV      |
| 3 | 195506147 | 195506147 | <i>MUC4</i>    | nonsynonymous_SNV      |
| 3 | 195506156 | 195506156 | <i>MUC4</i>    | nonsynonymous_SNV      |
| 3 | 195506267 | 195506267 | <i>MUC4</i>    | nonsynonymous_SNV      |
| 3 | 195506507 | 195506507 | <i>MUC4</i>    | nonsynonymous_SNV      |
| 3 | 195506530 | 195506530 | <i>MUC4</i>    | nonsynonymous_SNV      |
| 3 | 195506704 | 195506704 | <i>MUC4</i>    | nonsynonymous_SNV      |
| 3 | 195507226 | 195507226 | <i>MUC4</i>    | nonsynonymous_SNV      |
| 3 | 195510310 | 195510310 | <i>MUC4</i>    | nonsynonymous_SNV      |
| 3 | 195510613 | 195510613 | <i>MUC4</i>    | nonsynonymous_SNV      |
| 3 | 195512042 | 195512042 | <i>MUC4</i>    | nonsynonymous_SNV      |
| 3 | 195514558 | 195514558 | <i>MUC4</i>    | nonsynonymous_SNV      |
| 3 | 195514733 | 195514733 | <i>MUC4</i>    | nonsynonymous_SNV      |
| 3 | 195514768 | 195514768 | <i>MUC4</i>    | nonsynonymous_SNV      |
| 4 | 166300608 | 166300608 | <i>CPE</i>     | nonsynonymous_SNV      |
| 5 | 139931628 | 139931628 | <i>SRA1</i>    | frameshift_insertion   |
| 5 | 140307142 | 140307142 | <i>PCDHAC1</i> | nonsynonymous_SNV      |
| 5 | 140725635 | 140725635 | <i>PCDHGA3</i> | nonsynonymous_SNV      |
| 5 | 149512332 | 149512332 | <i>PDGFRB</i>  | nonsynonymous_SNV      |
| 6 | 16327953  | 16327955  | <i>ATXN1</i>   | nonframeshift_deletion |
| 6 | 39513453  | 39513453  | <i>KIF6</i>    | frameshift_deletion    |
| 6 | 41895234  | 41895234  | <i>BYSL</i>    | nonsynonymous_SNV      |

|    |           |           |                 |                         |
|----|-----------|-----------|-----------------|-------------------------|
| 6  | 43970526  | 43970531  | <i>C6orf223</i> | nonframeshift_deletion  |
| 7  | 1586661   | 1586661   | <i>TMEM184A</i> | nonframeshift_insertion |
| 7  | 15725824  | 15725826  | <i>MEOX2</i>    | nonframeshift_deletion  |
| 7  | 44040763  | 44040763  | <i>SPDYE1</i>   | nonsynonymous_SNV       |
| 7  | 44120345  | 44120345  | <i>POLM</i>     | nonsynonymous_SNV       |
| 7  | 64167644  | 64167644  | <i>ZNF107</i>   | nonsynonymous_SNV       |
| 7  | 64169019  | 64169019  | <i>ZNF107</i>   | frameshift_insertion    |
| 7  | 100639147 | 100639147 | <i>MUC12</i>    | nonsynonymous_SNV       |
| 7  | 100639153 | 100639153 | <i>MUC12</i>    | nonsynonymous_SNV       |
| 7  | 100646440 | 100646440 | <i>MUC12</i>    | nonsynonymous_SNV       |
| 7  | 100647338 | 100647338 | <i>MUC12</i>    | nonsynonymous_SNV       |
| 7  | 100647339 | 100647339 | <i>MUC12</i>    | nonsynonymous_SNV       |
| 7  | 100647376 | 100647376 | <i>MUC12</i>    | nonsynonymous_SNV       |
| 7  | 143270465 | 143270465 | <i>CTAGE15P</i> | nonsynonymous_SNV       |
| 8  | 7629232   | 7629232   | <i>FAM90A10</i> | nonsynonymous_SNV       |
| 8  | 144511981 | 144511983 | <i>MAFA</i>     | nonframeshift_deletion  |
| 9  | 79318378  | 79318392  | <i>PRUNE2</i>   | nonframeshift_deletion  |
| 9  | 90534190  | 90534202  | <i>FAM75C1</i>  | frameshift_substitution |
| 9  | 90746922  | 90746922  | <i>FAM75C2</i>  | nonsynonymous_SNV       |
| 9  | 97080947  | 97080949  | <i>FAM22F</i>   | nonframeshift_deletion  |
| 9  | 107367666 | 107367667 | <i>OR13C2</i>   | frameshift_deletion     |
| 10 | 27342292  | 27342294  | <i>ANKRD26</i>  | nonframeshift_deletion  |
| 10 | 50535007  | 50535007  | <i>C10orf71</i> | frameshift_insertion    |

|    |           |           |                  |                         |
|----|-----------|-----------|------------------|-------------------------|
| 10 | 119302954 | 119302956 | <i>EMX2</i>      | nonframeshift_deletion  |
| 10 | 135438687 | 135438687 | <i>FRG2B</i>     | nonsynonymous_SNV       |
| 10 | 135438929 | 135438929 | <i>FRG2B</i>     | nonsynonymous_SNV       |
| 10 | 135438943 | 135438943 | <i>FRG2B</i>     | nonsynonymous_SNV       |
| 10 | 135438961 | 135438961 | <i>FRG2B</i>     | nonsynonymous_SNV       |
| 11 | 65636053  | 65636053  | <i>EFEMP2</i>    | nonsynonymous_SNV       |
| 13 | 72440664  | 72440664  | <i>DACHI</i>     | nonsynonymous_SNV       |
| 15 | 34825154  | 34825154  | <i>GOLGA8B</i>   | nonsynonymous_SNV       |
| 15 | 82637448  | 82637448  | <i>GOLGA6L10</i> | nonsynonymous_SNV       |
| 19 | 1556482   | 1556482   | <i>MEX3D</i>     | nonsynonymous_SNV       |
| 19 | 13318707  | 13318712  | <i>CACNA1A</i>   | nonframeshift_deletion  |
| 19 | 20807178  | 20807178  | <i>ZNF626</i>    | frameshift_insertion    |
| 19 | 22156850  | 22156850  | <i>ZNF208</i>    | nonsynonymous_SNV       |
| 19 | 46627337  | 46627337  | <i>IGFL3</i>     | nonsynonymous_SNV       |
| 20 | 126314    | 126315    | <i>DEFB126</i>   | frameshift_deletion     |
| 20 | 238439    | 238444    | <i>DEFB132</i>   | nonframeshift_deletion  |
| 20 | 32664865  | 32664865  | <i>RALY</i>      | nonframeshift_insertion |



**Supplementary Table SII. Sixty three homozygous regions from homozygosity mapping**

| Chromosome | SNP1        | SNP2        | Position 1  | Position 2  | Size (Kb) |
|------------|-------------|-------------|-------------|-------------|-----------|
| 1          | kgp9226796  | kgp15281431 | 42,272,542  | 43,304,041  | 1031.499  |
| 1          | rs12043872  | kgp2176506  | 50,644,891  | 52,222,874  | 1577.983  |
| 1          | kgp22807508 | kgp15446070 | 175,901,363 | 177,085,495 | 1184.132  |
| 2          | rs13383059  | kgp1338077  | 60,542,657  | 61,840,186  | 1297.529  |
| 2          | kgp22835335 | rs1345516   | 63,283,437  | 64,703,286  | 1419.849  |
| 2          | kgp10464820 | kgp11645441 | 72,356,303  | 73,389,904  | 1033.601  |
| 2          | kgp22748117 | rs11683207  | 95,350,864  | 98,333,290  | 2982.426  |
| 2          | kgp11241972 | kgp14721953 | 110,452,502 | 111,457,965 | 1005.463  |
| 2          | kgp14255701 | kgp4421106  | 155,497,134 | 156,765,691 | 1268.557  |
| 3          | rs2242150   | kgp920744   | 48,505,964  | 50,176,739  | 1670.775  |
| 3          | rs1528197   | kgp5972268  | 62,404,892  | 63,669,341  | 1264.449  |
| 3          | kgp7194326  | rs17024881  | 84,835,064  | 86,118,949  | 1283.885  |
| 3          | rs6804377   | kgp10736192 | 89,271,087  | 90,501,225  | 1230.138  |
| 3          | kgp17732198 | kgp3463695  | 186,780,268 | 195,465,310 | 8685.042  |
| 3          | rs3747673   | kgp22812098 | 195,611,844 | 197,891,568 | 2279.724  |

|   |             |             |             |             |           |
|---|-------------|-------------|-------------|-------------|-----------|
| 4 | rs922333    | kgp20990514 | 64,121,298  | 65,135,489  | 1014.191  |
| 4 | kgp12219459 | kgp21246176 | 155,003,651 | 182,666,898 | 27663.247 |
| 5 | rs11948368  | kgp6573465  | 4,225,004   | 10,668,729  | 6443.725  |
| 5 | kgp3769852  | rs13184580  | 42,912,540  | 43,918,326  | 1005.786  |
| 5 | kgp3714973  | kgp12345716 | 132,628,429 | 141,015,519 | 8387.09   |
| 5 | rs41098     | kgp22527688 | 141,020,100 | 149,585,074 | 8564.974  |
| 5 | kgp22340708 | kgp10344299 | 149,587,580 | 172,127,143 | 22539.563 |
| 5 | kgp22126080 | kgp3444559  | 172,127,834 | 173,730,182 | 1602.348  |
| 6 | rs12663002  | rs3094575   | 28,441,634  | 29,515,802  | 1074.168  |
| 6 | kgp9471913  | kgp17000708 | 34,187,366  | 43,010,582  | 8823.216  |
| 6 | rs9342711   | kgp8490913  | 69,197,250  | 70,393,636  | 1196.386  |
| 6 | rs6926330   | kgp17199538 | 91,038,726  | 108,320,258 | 17281.532 |
| 6 | kgp6823635  | kgp10978549 | 126,186,643 | 127,216,752 | 1030.109  |
| 7 | rs17714729  | kgp13497896 | 40,925,373  | 44,100,951  | 3175.578  |
| 7 | kgp13393169 | kgp1758811  | 44,282,204  | 58,042,660  | 13760.456 |
| 7 | kgp13613108 | kgp7238344  | 61,055,273  | 63,041,496  | 1986.223  |
| 7 | kgp22797960 | kgp1628657  | 63,234,502  | 64,474,466  | 1239.964  |

|    |             |             |             |             |           |
|----|-------------|-------------|-------------|-------------|-----------|
| 7  | kgp8836768  | kgp6578278  | 64,476,704  | 66,158,076  | 1681.372  |
| 7  | kgp11959682 | kgp731589   | 66,835,845  | 73,110,455  | 6274.61   |
| 7  | kgp13574770 | kgp13241424 | 73,254,871  | 75,614,264  | 2359.393  |
| 7  | rs782487    | rs41542     | 76,161,400  | 93,722,036  | 17560.636 |
| 8  | rs35292150  | rs10097659  | 7,154,036   | 8,241,316   | 1087.28   |
| 8  | kgp20383958 | kgp20415047 | 47,840,086  | 50,247,347  | 2407.261  |
| 8  | kgp4568187  | kgp4989542  | 50,287,180  | 51,332,763  | 1045.583  |
| 8  | kgp11163141 | kgp8120576  | 83,652,903  | 84,739,570  | 1086.667  |
| 8  | kgp1752758  | rs6468704   | 99,405,919  | 100,994,389 | 1588.47   |
| 8  | rs1318739   | kgp3429874  | 104,122,872 | 105,175,235 | 1052.363  |
| 8  | kgp20054401 | kgp10669054 | 114,857,226 | 115,996,248 | 1139.022  |
| 9  | kgp3876298  | kgp18506353 | 66,771,643  | 71,032,042  | 4260.399  |
| 10 | kgp22751182 | kgp22827934 | 73,974,125  | 75,401,246  | 1427.121  |
| 10 | kgp28675    | kgp1752039  | 128,613,842 | 133,791,976 | 5178.134  |
| 11 | rs7129994   | kgp12754305 | 84,380,034  | 85,620,335  | 1240.301  |
| 12 | kgp1178574  | rs7311759   | 111,816,925 | 113,261,665 | 1444.74   |
| 13 | kgp7808335  | rs8002509   | 36,452,369  | 47,822,976  | 11370.607 |

|    |             |             |            |            |          |
|----|-------------|-------------|------------|------------|----------|
| 13 | rs9568798   | kgp16817285 | 53,614,554 | 54,687,807 | 1073.253 |
| 13 | kgp9865216  | kgp16686988 | 61,860,814 | 62,932,723 | 1071.909 |
| 13 | kgp7743232  | rs9523513   | 65,234,035 | 92,781,385 | 27547.35 |
| 13 | kgp1128060  | rs16953570  | 96,133,164 | 97,438,801 | 1305.637 |
| 15 | rs4508402   | rs4779824   | 30,361,587 | 31,404,294 | 1042.707 |
| 15 | kgp19953534 | kgp19917981 | 64,125,067 | 65,168,281 | 1043.214 |
| 16 | kgp6578578  | kgp22822345 | 31,888,867 | 33,579,417 | 1690.55  |
| 16 | kgp10923077 | kgp16403964 | 46,920,923 | 48,045,778 | 1124.855 |
| 17 | kgp22779423 | kgp14115230 | 57,513,947 | 59,233,842 | 1719.895 |
| 18 | kgp9512908  | kgp6363611  | 51,184,594 | 52,469,636 | 1285.042 |
| 19 | rs1144539   | kgp7929656  | 37,331,614 | 38,475,123 | 1143.509 |
| 20 | kgp19251773 | rs6061136   | 29,423,716 | 30,644,465 | 1220.749 |
| 20 | kgp19300395 | rs2425193   | 32,830,486 | 34,848,116 | 2017.63  |
| 21 | kgp6761551  | kgp7702343  | 41,544,215 | 44,477,135 | 2932.92  |

|                                               |                                                                                     |
|-----------------------------------------------|-------------------------------------------------------------------------------------|
| <b><i>Kif6<sup>tm1a(KOMP)Wtsi</sup></i></b>   |                                                                                     |
| <b>Cassette primers</b>                       |                                                                                     |
| CSD-lacF                                      | GCTACCATTACCAGTTGGTCTGGTGTC                                                         |
| CSD-neoF                                      | GGGATCTCATGCTGGAGTTCTTCG                                                            |
| CSD-loxF                                      | GAGATGGCGCAACGCAATTAATG                                                             |
| <b><i>Kif6<sup>tm1a(KOMP)Wtsi</sup></i></b>   |                                                                                     |
| <b>Gene Specific Primers</b>                  |                                                                                     |
| CSD-Kif6-R                                    | GGTTAGGAGGAAGAGAAGGGCATCC                                                           |
| CSD-Kif6-ttR                                  | ACAGATGCTGGAGATCACACTCTCG                                                           |
| CSD-Kif6-F                                    | ACTCTCTCAAAGCCCACATCATGC                                                            |
| <b>Mouse CRISPR oligos/genotyping primers</b> |                                                                                     |
| mKif6-R2-ex14-T7                              | TAATACGACTCACTATAGGAGATGTCACTGGGACGCCGTTTTAGAGCTAGAAATAGC                           |
| Universal T7 tracer                           | AAAAGCACCGACTCGGTGCCACTTTTTCAAGTTGATAACGGACTAGCCTTATTTAACTTGC<br>TATTTCTAGCTCTAAAAC |
| Ms_ <i>Kif6</i> crispr_r2_donor oligo         | GAGAGGAGATGTCACTGGGAGTCATGGCGTTTAAACCTTAATTAAGCTGTTGTAGCGCCAG<br>GAGGCTTTTGAGAT     |
| Mus_ <i>Kif6</i> _ex14F                       | TCCCAAAATGATGTGACTGAAG                                                              |
| Mus_ <i>Kif6</i> _ex14R                       | AGTCTCTGGACTGGCTTACCTG                                                              |
| <i>Kif6p.G555fs</i><br>3stopDonor_FWD         | CATGGCGTTTAAACCTTAATTAAGCTG                                                         |
| <i>Kif6p.G555fs</i><br>3stopDonor_REV         | CAGCTTAATTAAGTTTAAACGCCATG                                                          |
| <b>Mouse Kif6 qPCR primer sets</b>            |                                                                                     |
| Ms_ <i>Kif6</i> qPCR_exon8_FWD1               | TCGGAAAAACACCGTACACA                                                                |
| Ms_ <i>Kif6</i> qPCR_exon10_REV1              | CTTTTGCAAGCGAACAATCA                                                                |
| Ms_ <i>Kif6</i> qPCR_exon7_FWD2               | TTCAACCCGGTACACTGTA                                                                 |
| Ms_ <i>Kif6</i> qPCR_exon8_REV2               | TACGGTGTTTTCCGAAAGG                                                                 |
| Ms_ <i>Kif6</i> qPCR_exon6_FWD3               | TGGAGGACCCTGATCAGAAC                                                                |
| Ms_ <i>Kif6</i> qPCR_exon7_REV3               | TACAGTGTGACCGGGTTGAA                                                                |
